# Supplementary material for: Gastric microbiome of Indian patients with Helicobacter pylori infection, and their interaction networks
Source: PubMed Central journal article supplement (PMC5684312; doi:10.1038/s41598-017-15510-6), 2017-11-13
Supplement: 41598_2017_15510_MOESM1_ESM.pdf [file 41598_2017_15510_MOESM1_ESM.pdf]

# Gastric microbiome of Indian patients with *Helicobacter pylori* infection, and their interaction networks

Anubhav Das<sup>1#</sup>, Verima Pereira<sup>2#</sup>, Shruti Saxena<sup>3#</sup>, Tarini Shankar Ghosh<sup>1</sup>, Anbumani D<sup>3</sup>, Satyabrata Bag<sup>3</sup>, Bhabatosh Das<sup>3</sup>, G. Balakrish Nair<sup>3</sup>, Philip Abraham<sup>2\*</sup>, Sharmila S Mande<sup>1\*</sup>

<sup>1</sup> Bio-Sciences R&D Division, TCS Research, Tata Research Development & Design Centre, Pune 411013, India

<sup>2</sup> Division of Gastroenterology, P D Hinduja Hospital, Mumbai 400016, India

<sup>3</sup> Molecular Genetics Laboratory, Centre for Human Microbial Ecology, Translational Health Science and Technology Institute, Faridabad 121001, India

# These authors have contributed equally

## \*Correspondence to:

Dr. Sharmila S Mande, Bio-Sciences R&D Division, TCS Research, Tata Research Development & Design Centre, 54-B, Hadapsar Industrial Estate, Pune 411013, India. E-mail: sharmila@atc.tcs.com. Fax: +91 2066086399. Phone: +912066086432

Dr. Philip Abraham, Division of Gastroenterology, P D Hinduja Hospital, Mahim, Mumbai 400016, India. E-mail: dr\_pabraham@hindujahospital.com. Fax: +91 22 24440425. Phone: +91 22 24447104

The following supplementary data includes information which has been used in this study.

The supplementary figure and legends along with supplementary tables and their respective titles are as follows.

## **Supplementary information**

**Supplementary Figure S1:** OTU level abundance profile of the reported Indian cohort.

**Supplementary Figure S2:** Heat map showing PCA loadings of genera onto the first 2 principal components, for all the samples.

**Supplementary Figure S3:** Heat map showing PCA loadings of genera onto the first 2 principal components, for samples other than Chinese\_Study\_2.

**Supplementary Figure S4:** Heatmap of ranked median abundances of each microbial genera present in the considered studies, showing geography-based clustering.

**Supplementary Figure S5:** Co-occurrence network of microbial genera present in samples from USA.

**Supplementary Figure S6:** Co-occurrence network of microbial genera present in samples from Chinese study 1.

**Supplementary Figure S7:** Co-occurrence network of microbial genera present in samples from Chinese study 2.

**Supplementary Figure S8:** Co-occurrence network of microbial genera present in samples from Colombian study.

**Supplementary Figure S9:** Negative interaction network of microbial genera present in samples from USA.

**Supplementary Figure S10:** Negative interaction network of microbial genera present in samples from Chinese study 1.

**Supplementary Figure S11:** Negative interaction network of microbial genera present in samples

from Chinese study 2.

**Supplementary Figure S12:** Negative interaction network of microbial genera present in samples from Colombian study.

**Supplementary Figure S13:** Variation of Shannon diversity with *Wolinella* abundance, as calculated for Chinese study 2.

**Supplementary Figure S14:** Variation of Shannon diversity with *Helicobacter* abundance, as calculated for Colombian study.

**Supplementary Table S1:** Sample IDs of subjects of reported Indian cohort, with corresponding age and gender information along with group affiliation.

**Supplementary Table S2:** Taxonomic lineage from classification of Operational Taxonomic Units (OTUs).

**Supplementary Table S3:** Microbial genera and corresponding lowest taxa affiliation identified at OTU level.

**Supplementary Table S4:** Microbial genera identified in reported Indian cohort and corresponding cluster affiliations.

**Supplementary Table S5:** Sample ids and sequencing information of each sample.

**Supplementary Figure S1:** OTU level abundance profile of the reported Indian cohort.

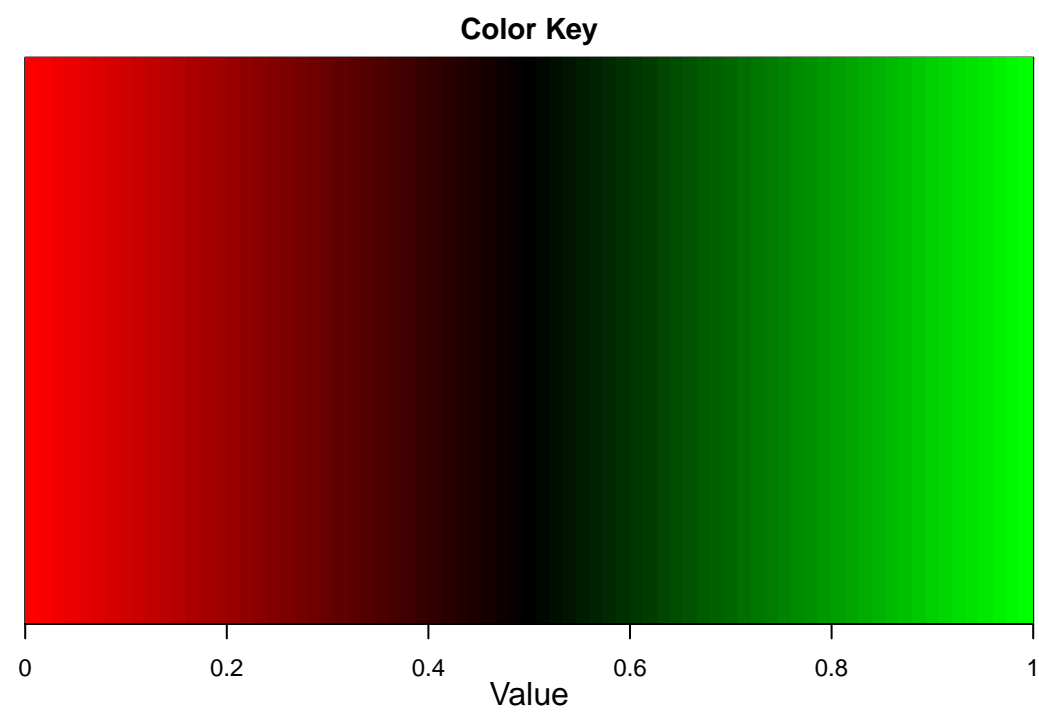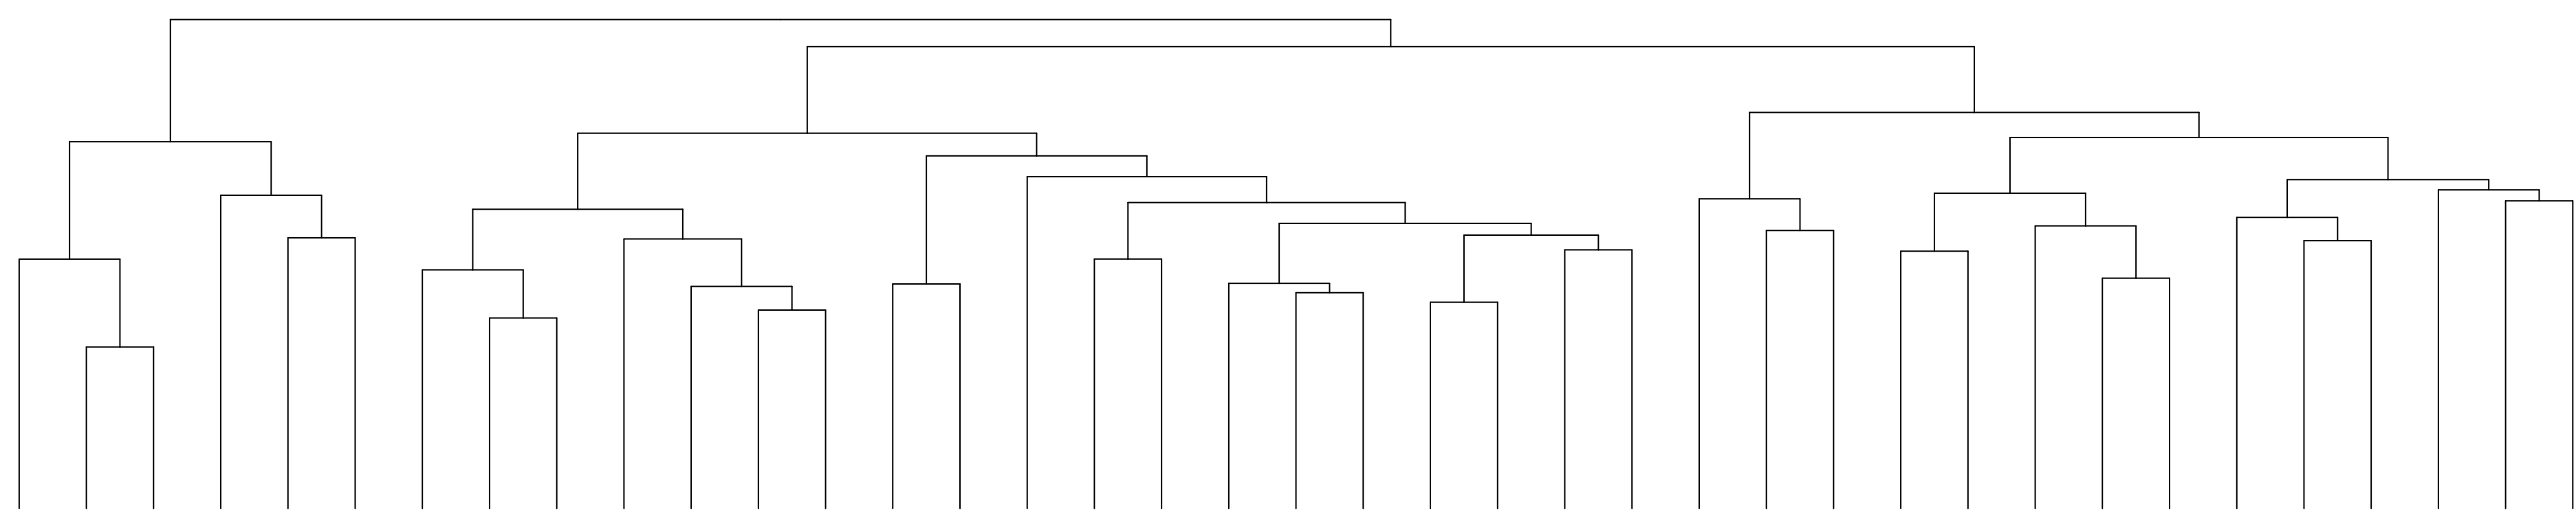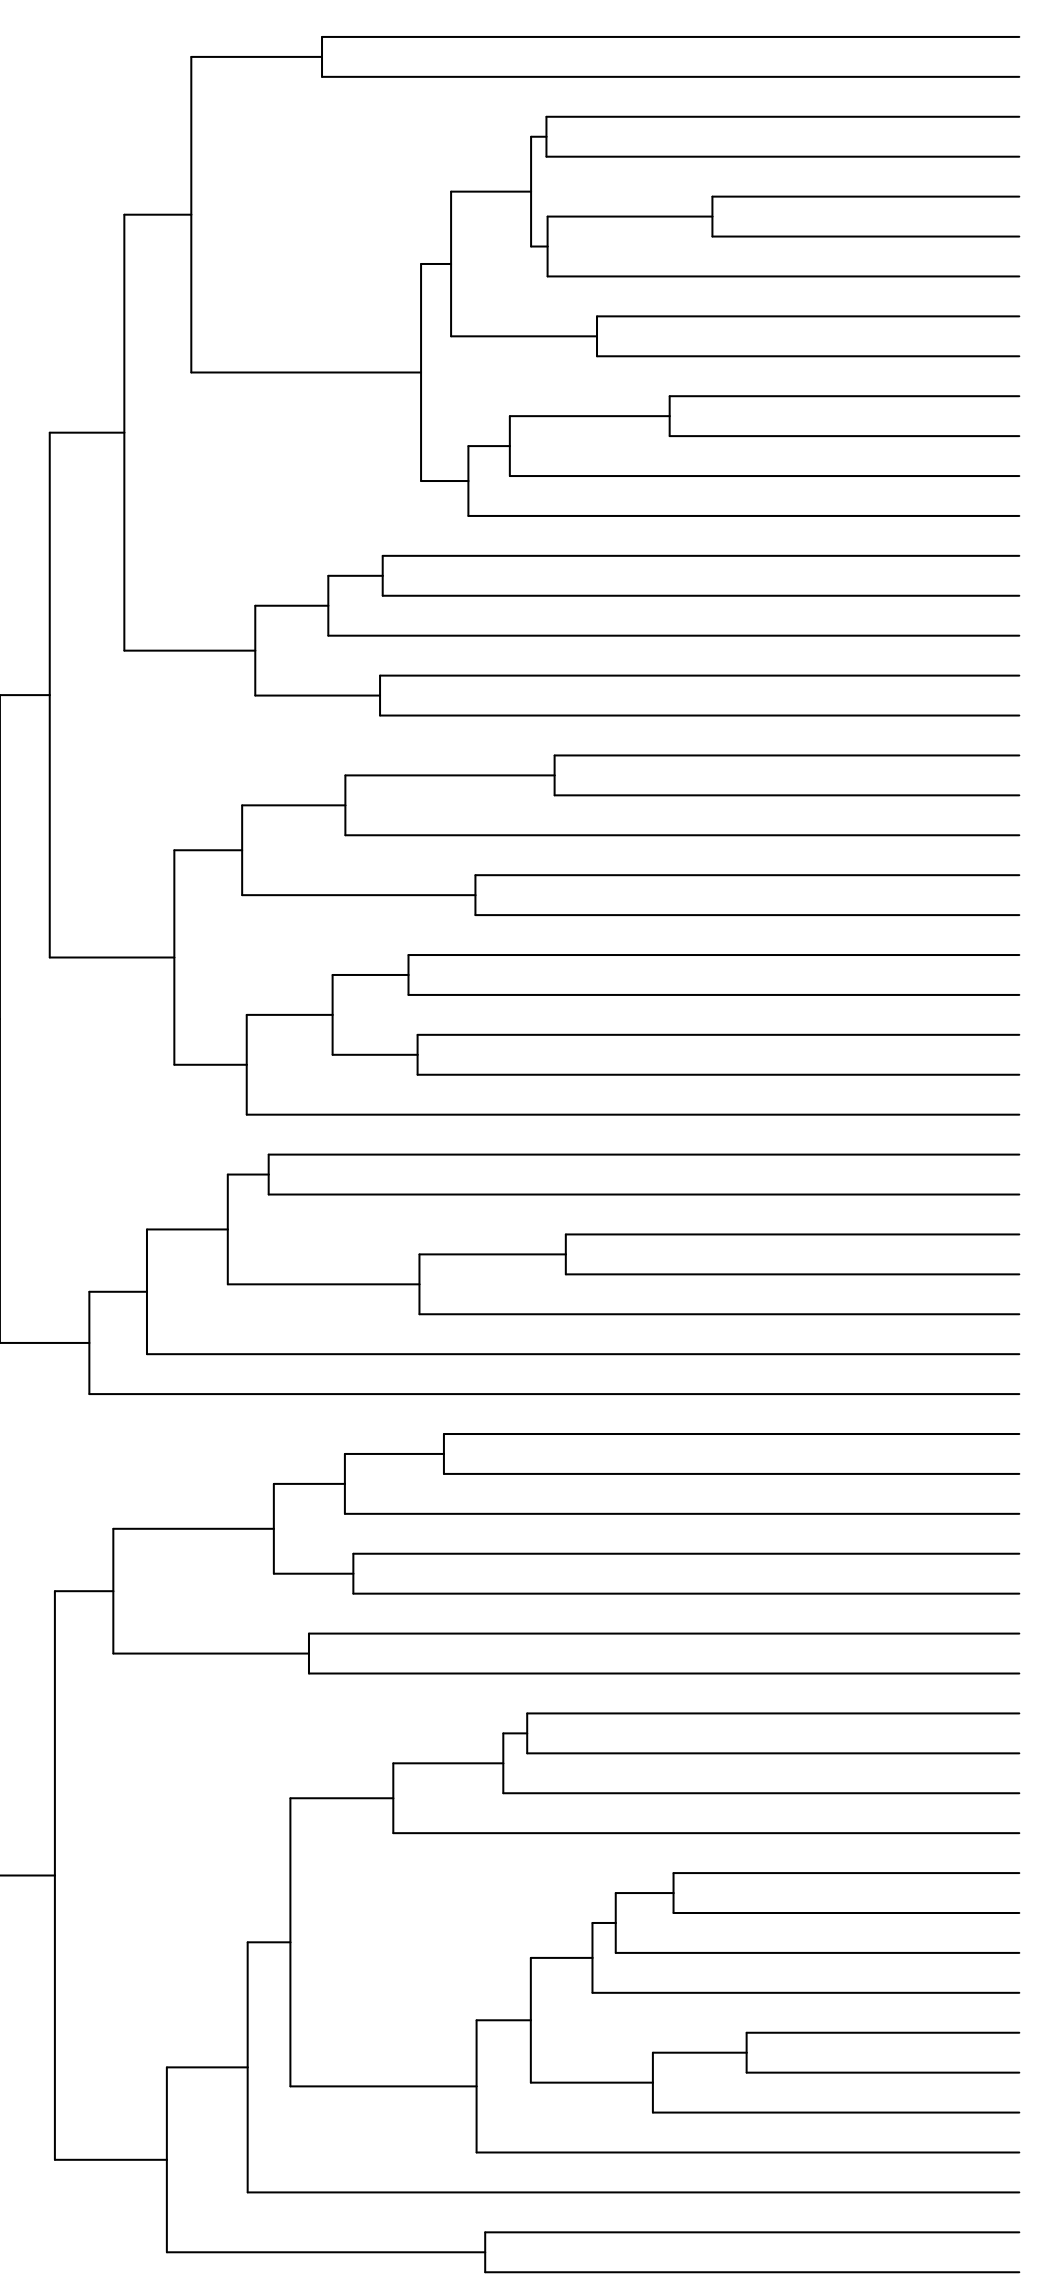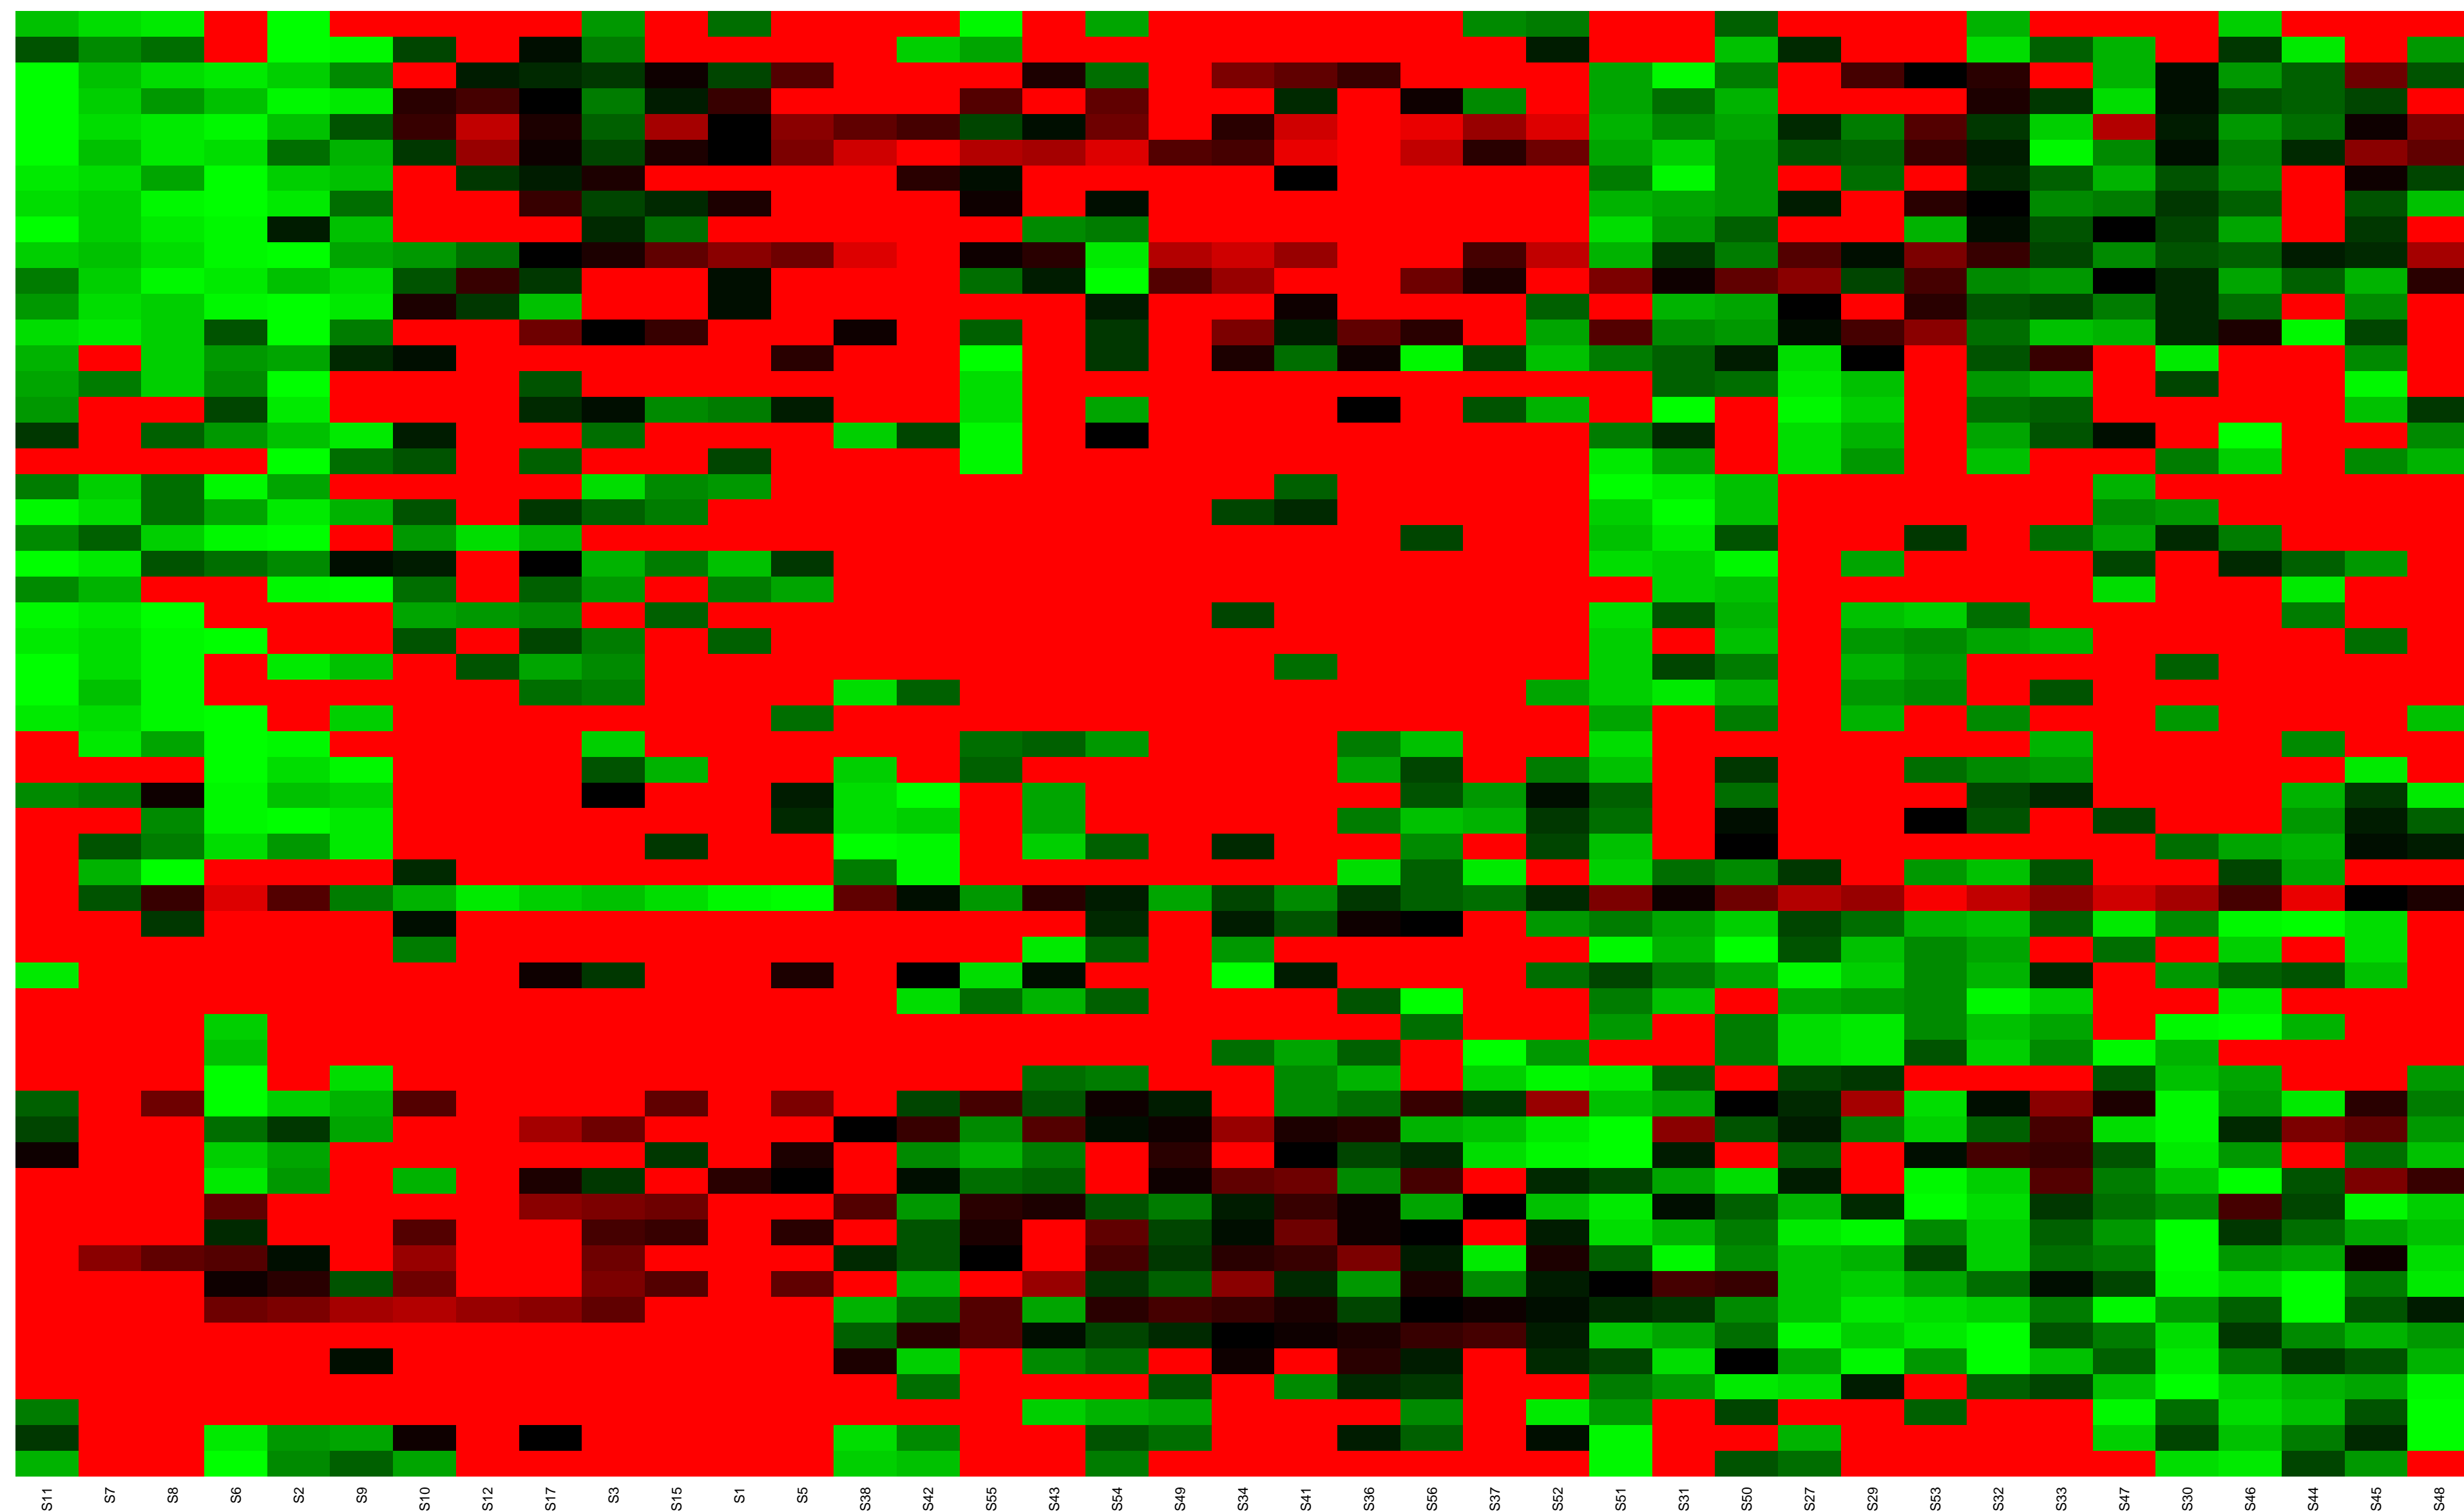

**Supplementary Figure S2:** Heat map showing PCA loadings of genera onto the first 2 principal components, for all the samples.

Color Key

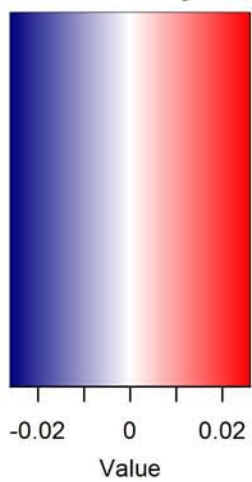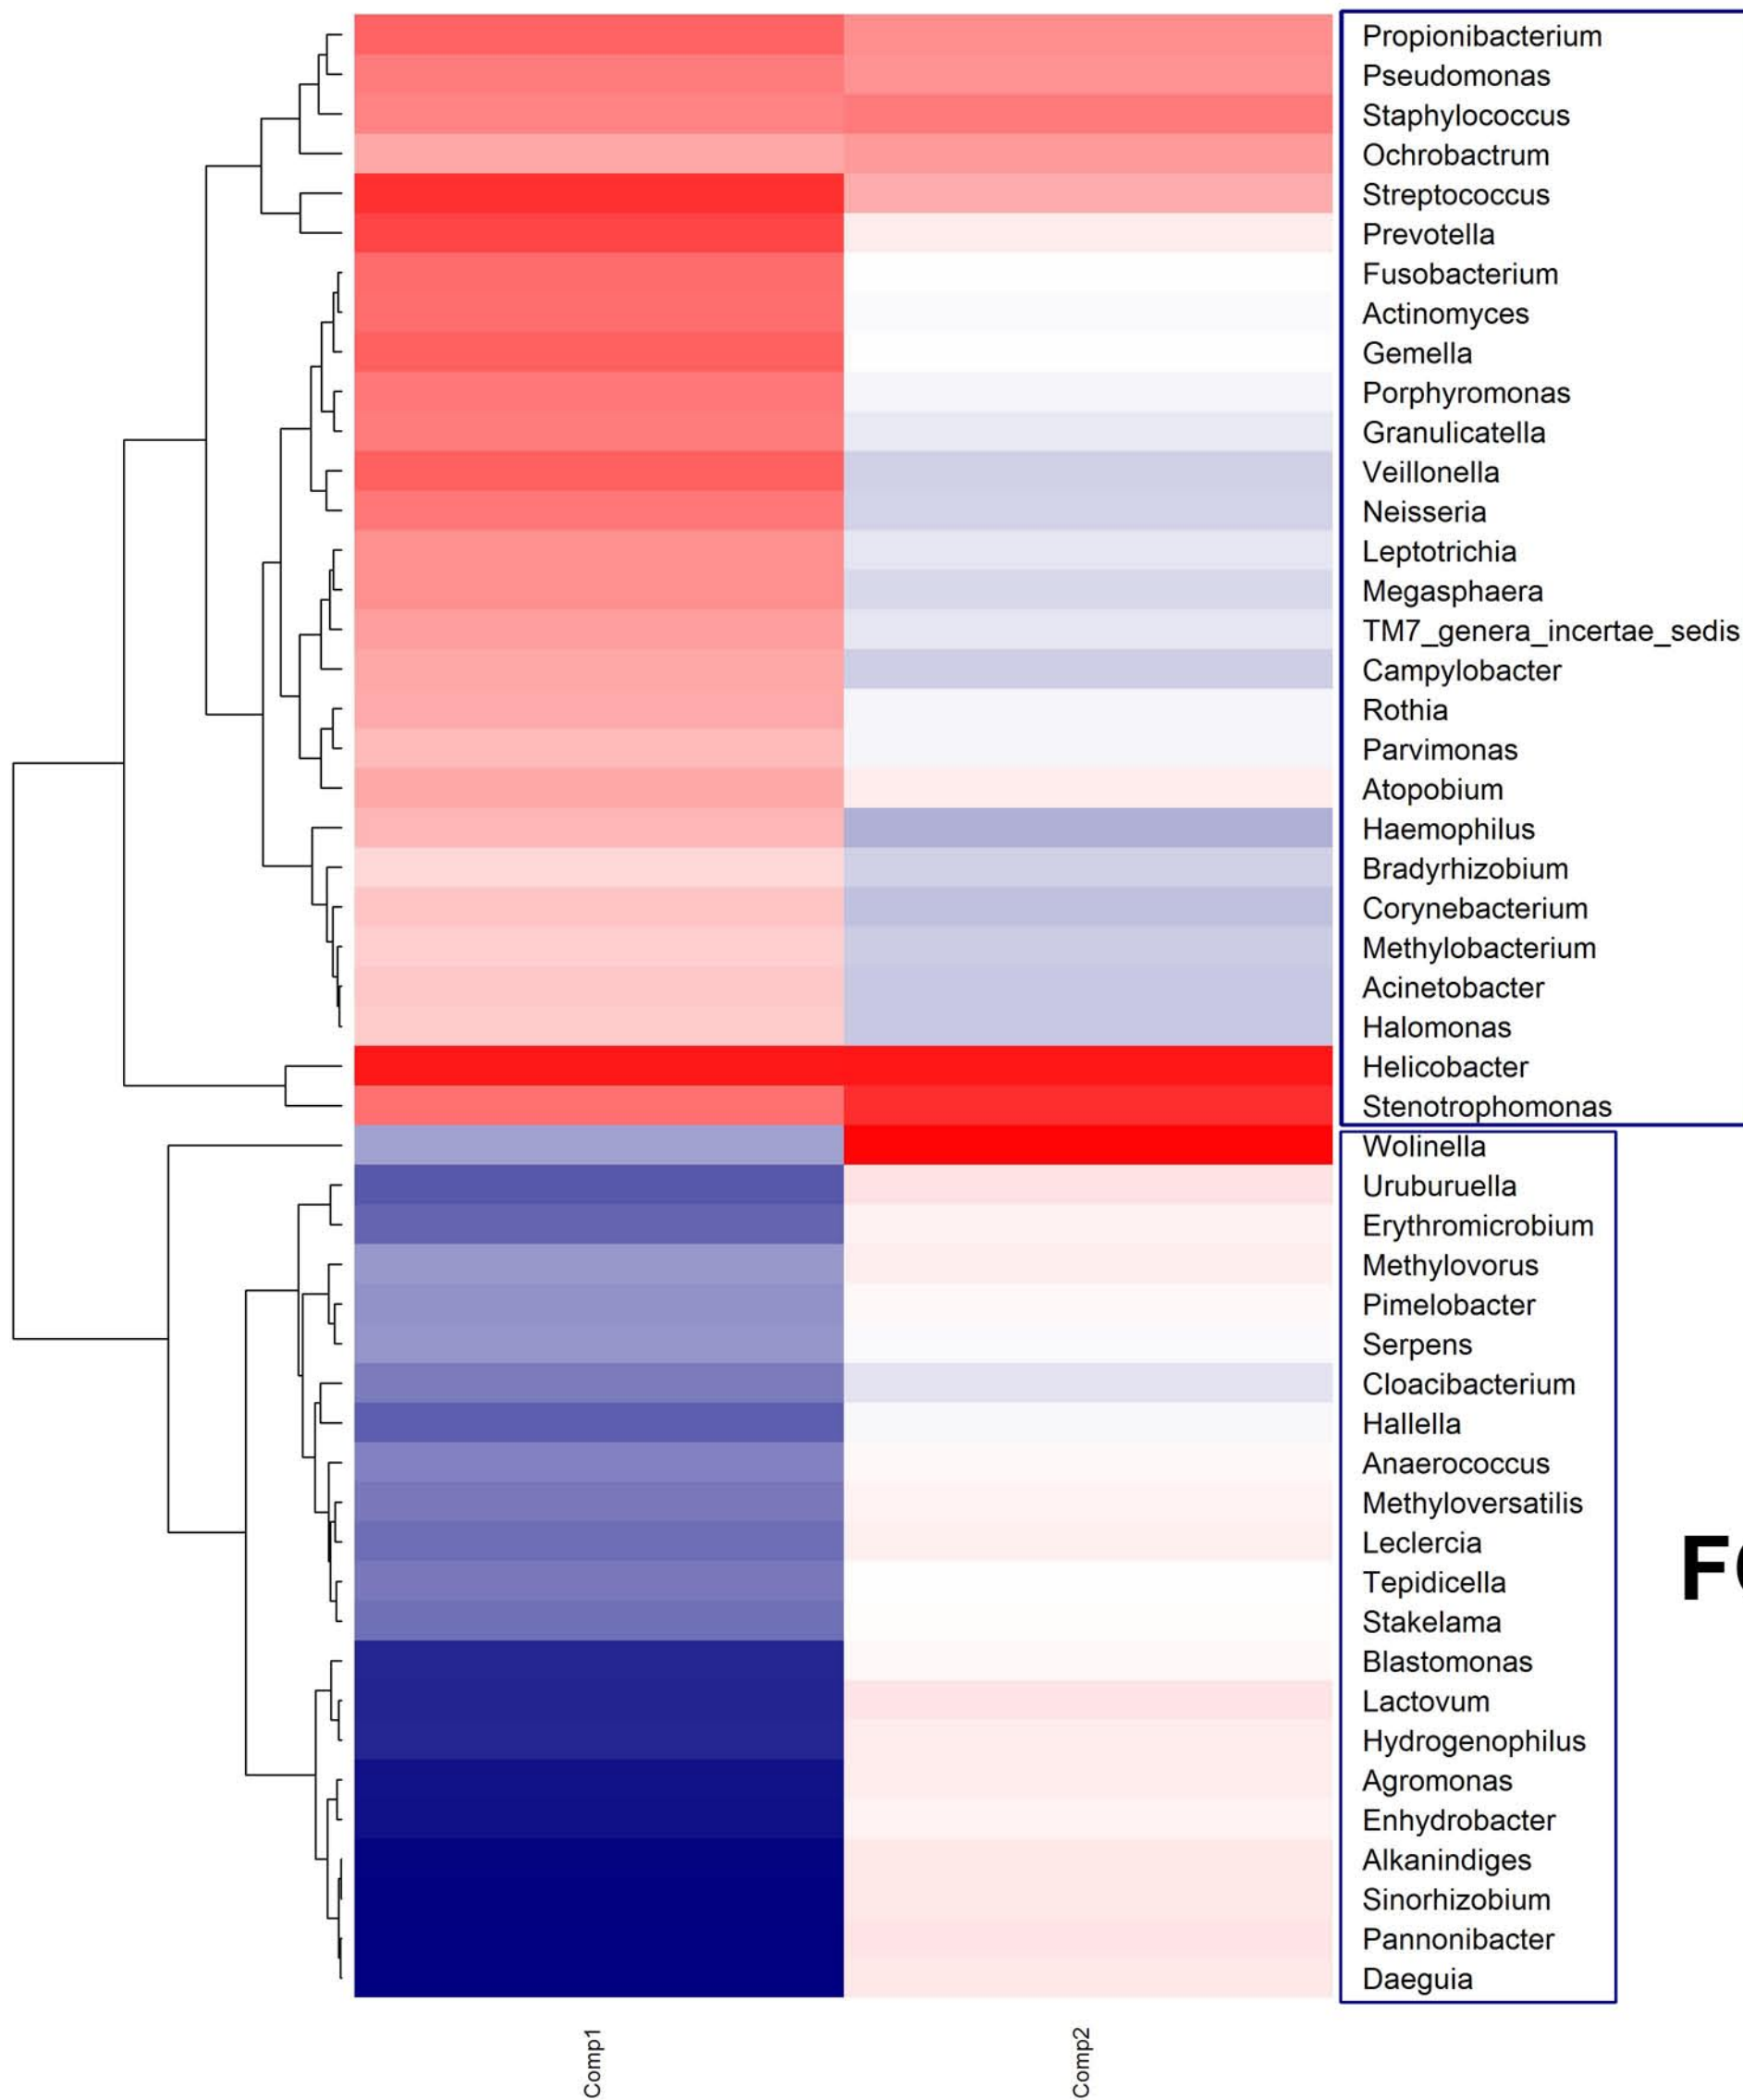

**FC2**

**FC1**

**Supplementary Figure S3:** Heat map showing PCA loadings of genera onto the first 2 principal components, for samples other than Chinese\_Study\_2.



Color Key

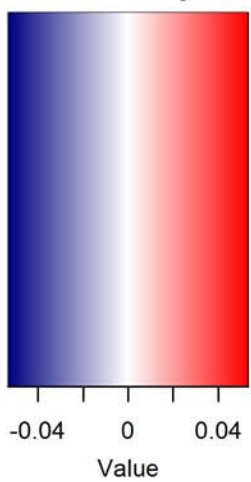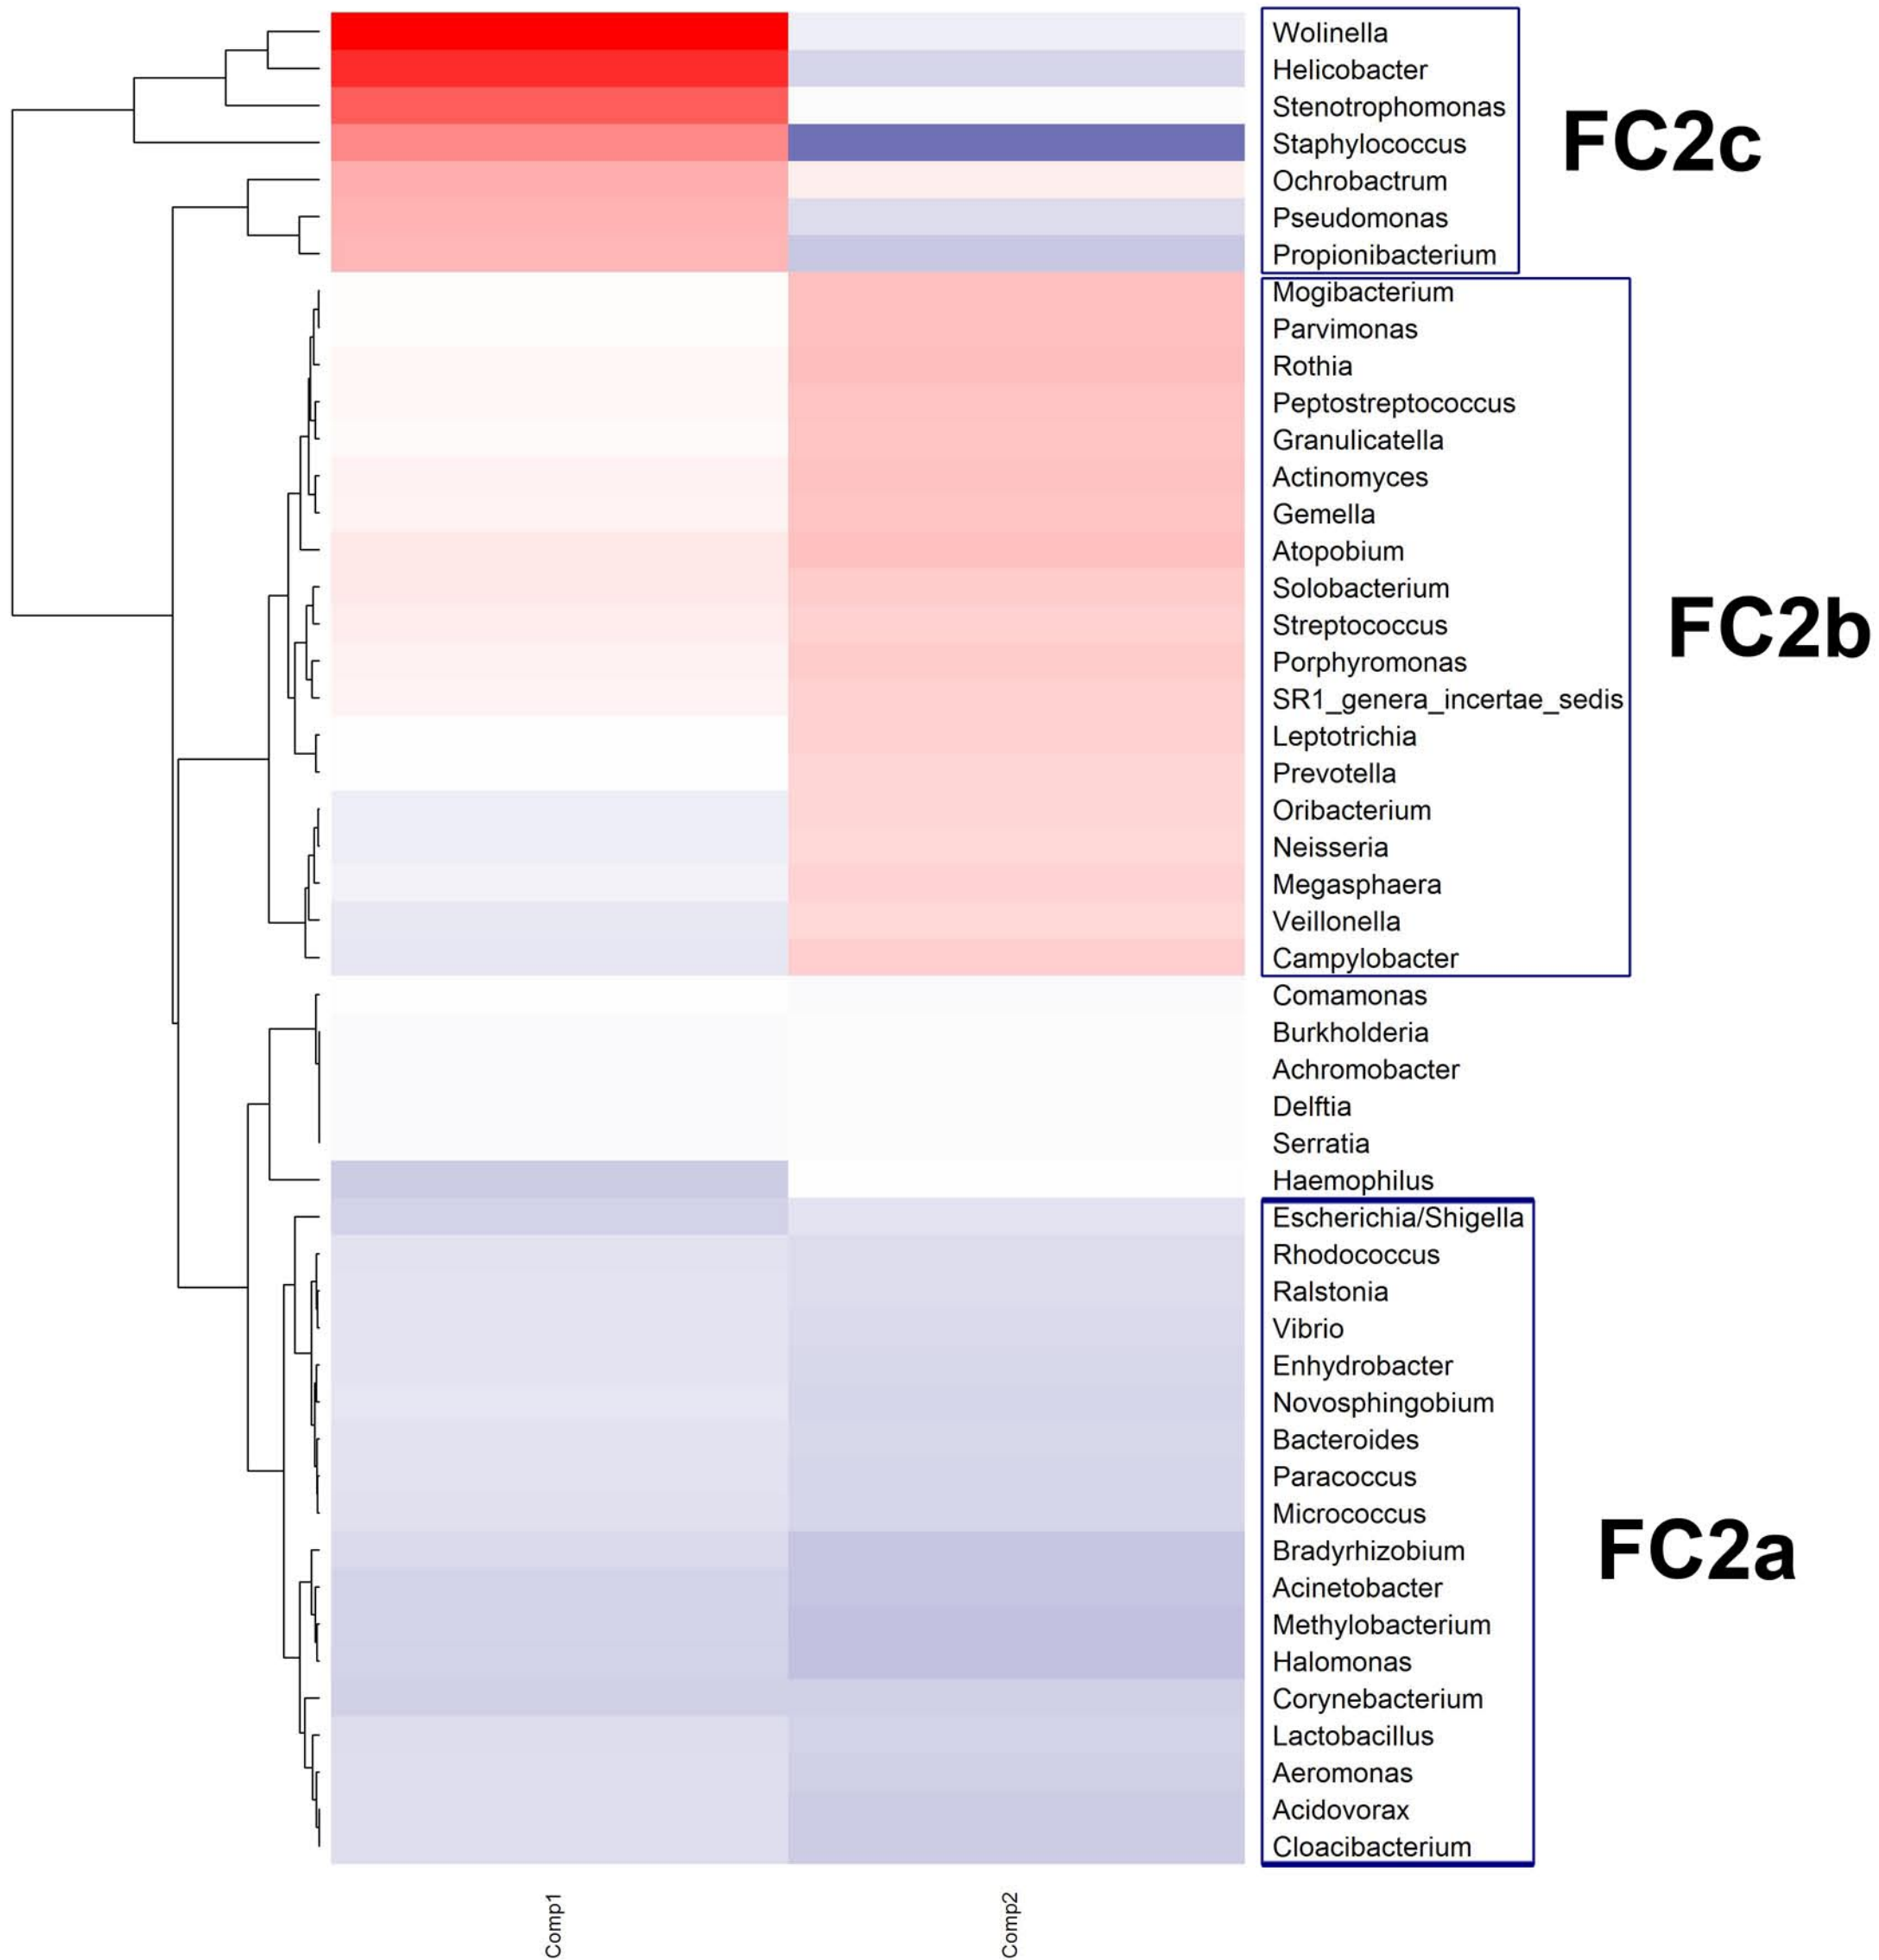

**Supplementary Figure S4:** Heat map of ranked median abundances of each microbial genera present in the considered studies, showing geography-based clustering.

Color Key

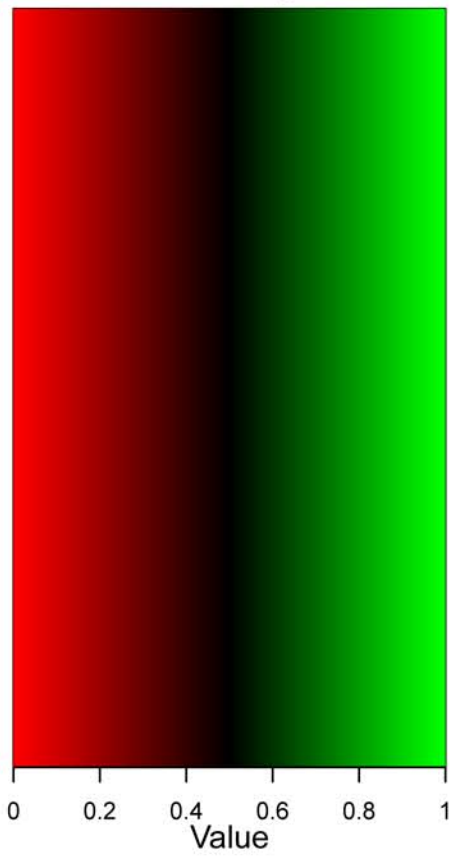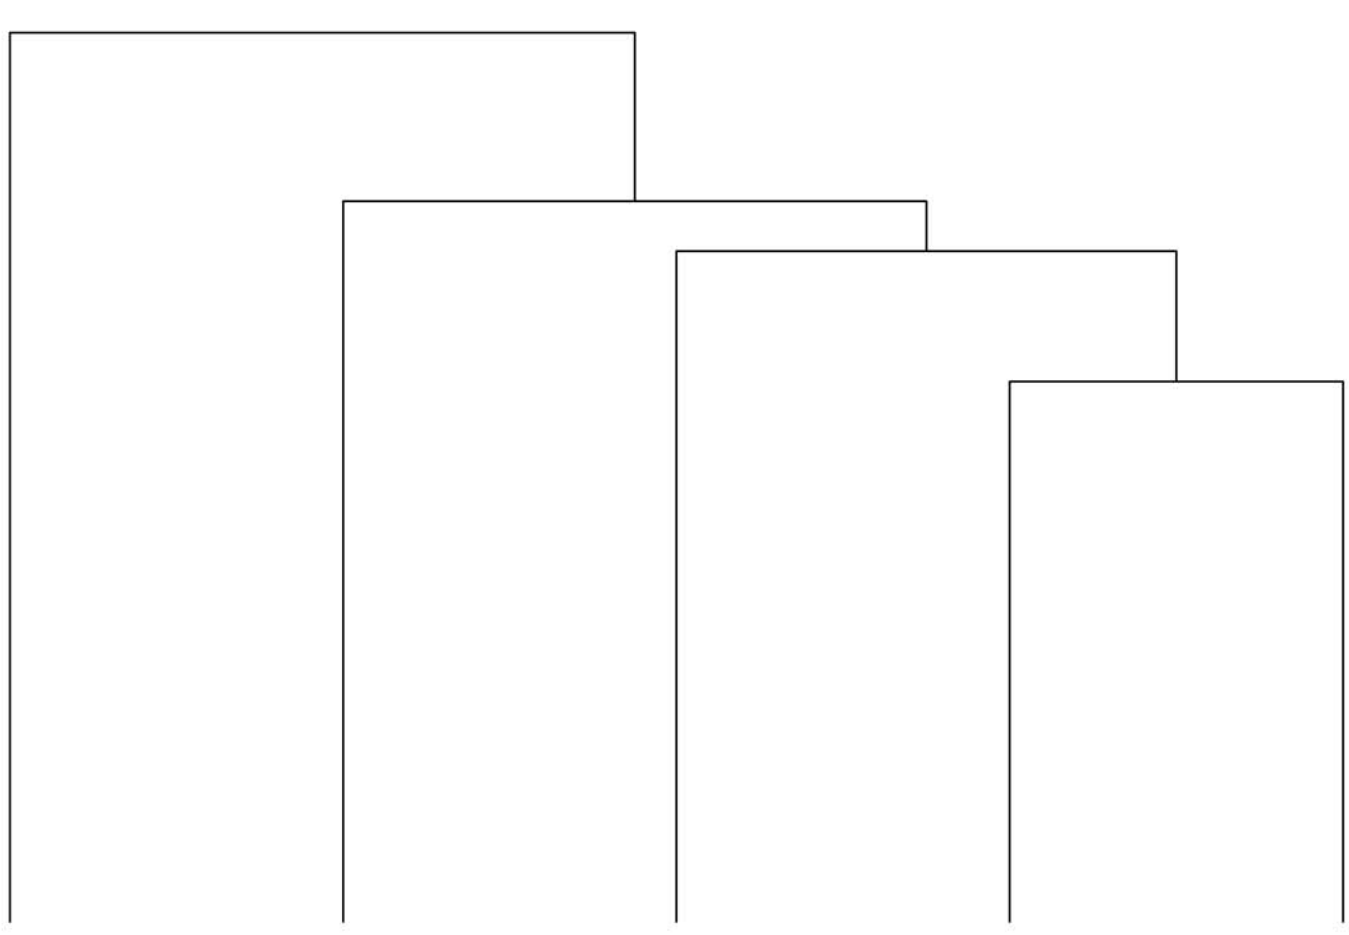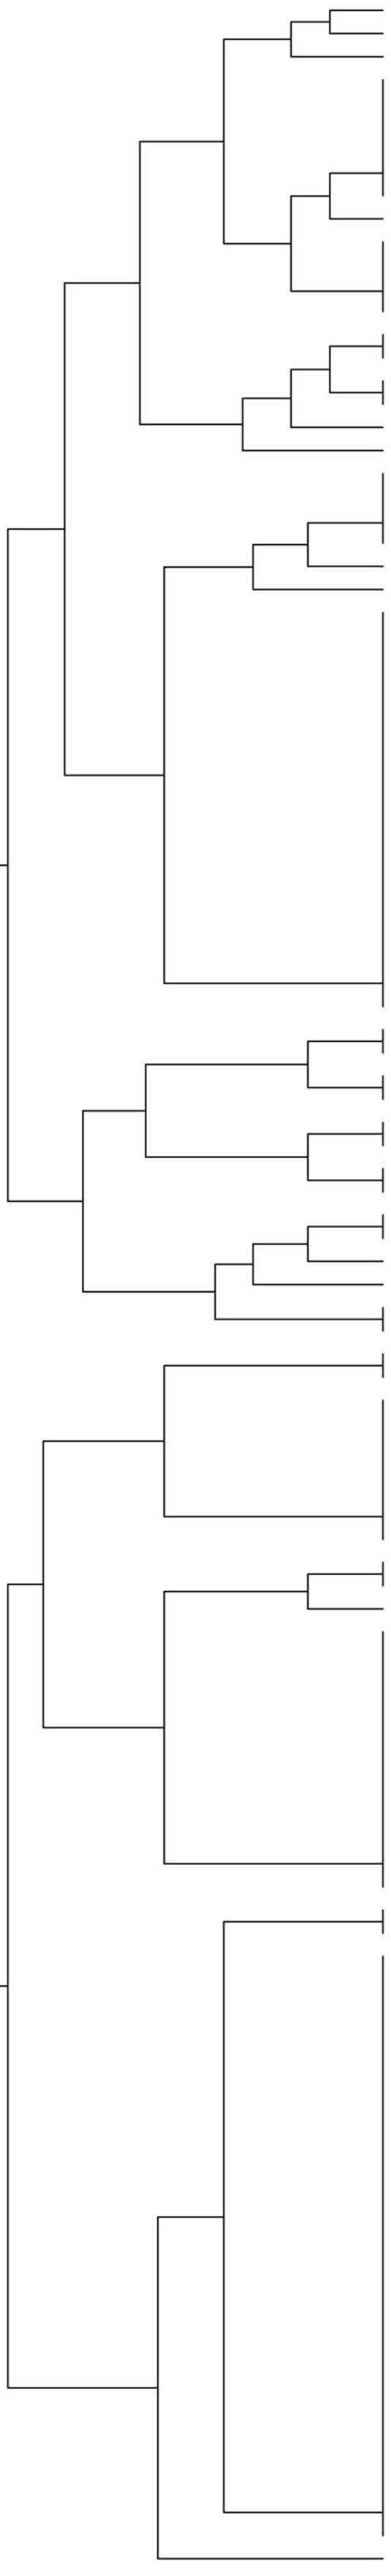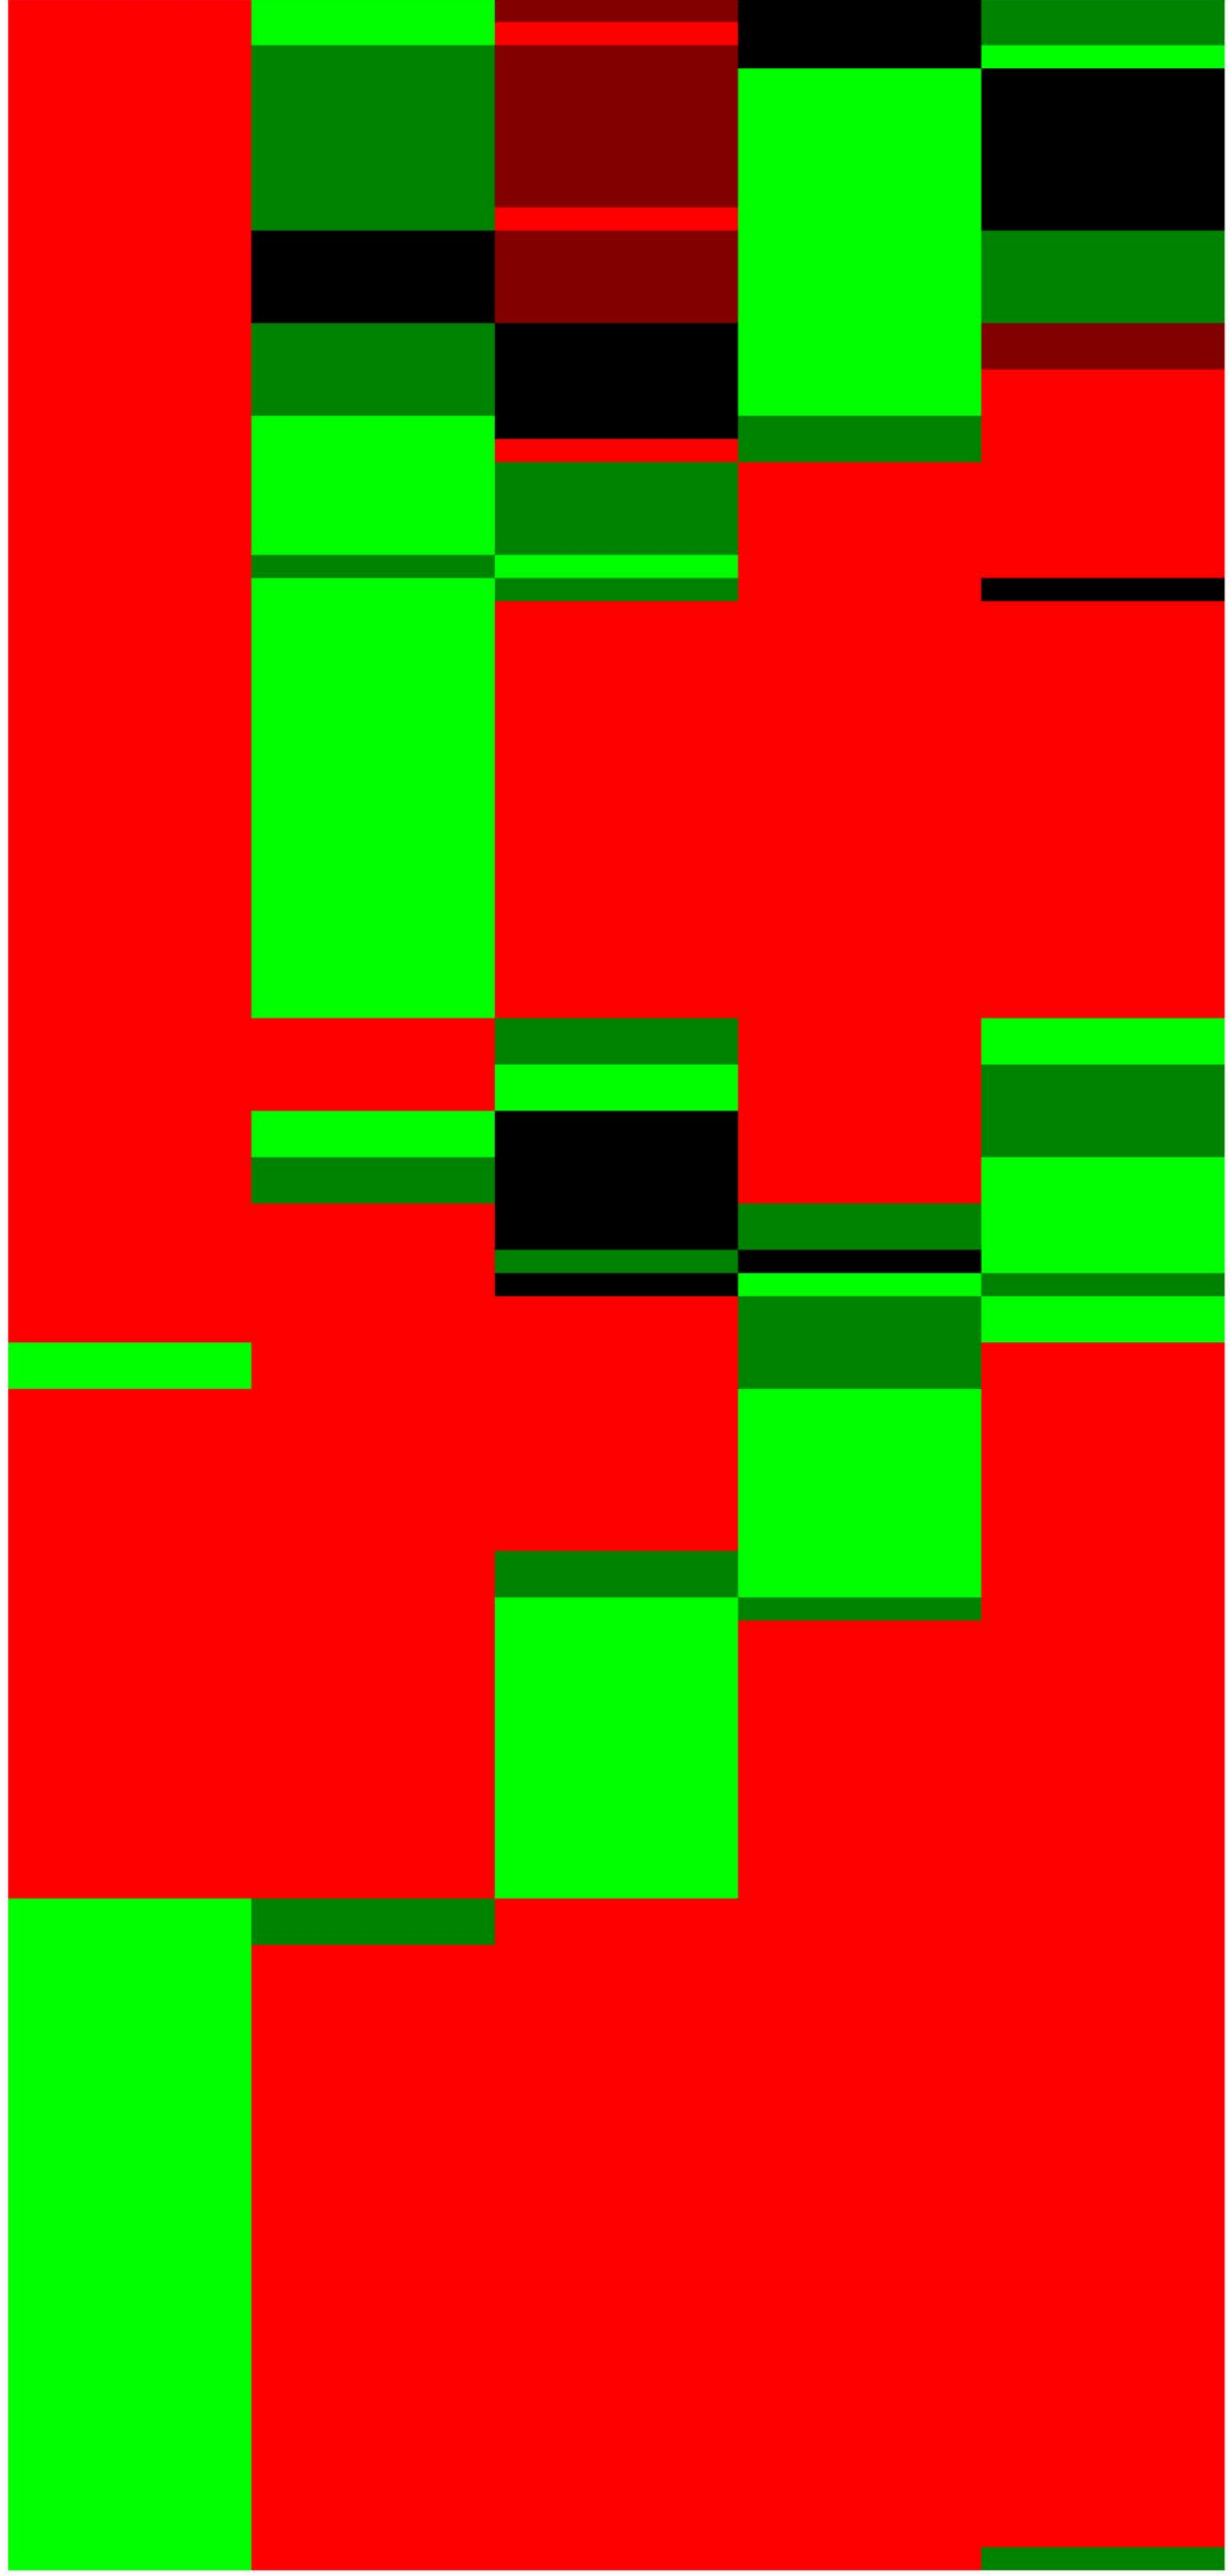

China\_Study\_2

India

China\_Study\_1

USA

Colombia

# Supplementary Figure S5: Co-occurrence network of microbial genera present in samples from USA

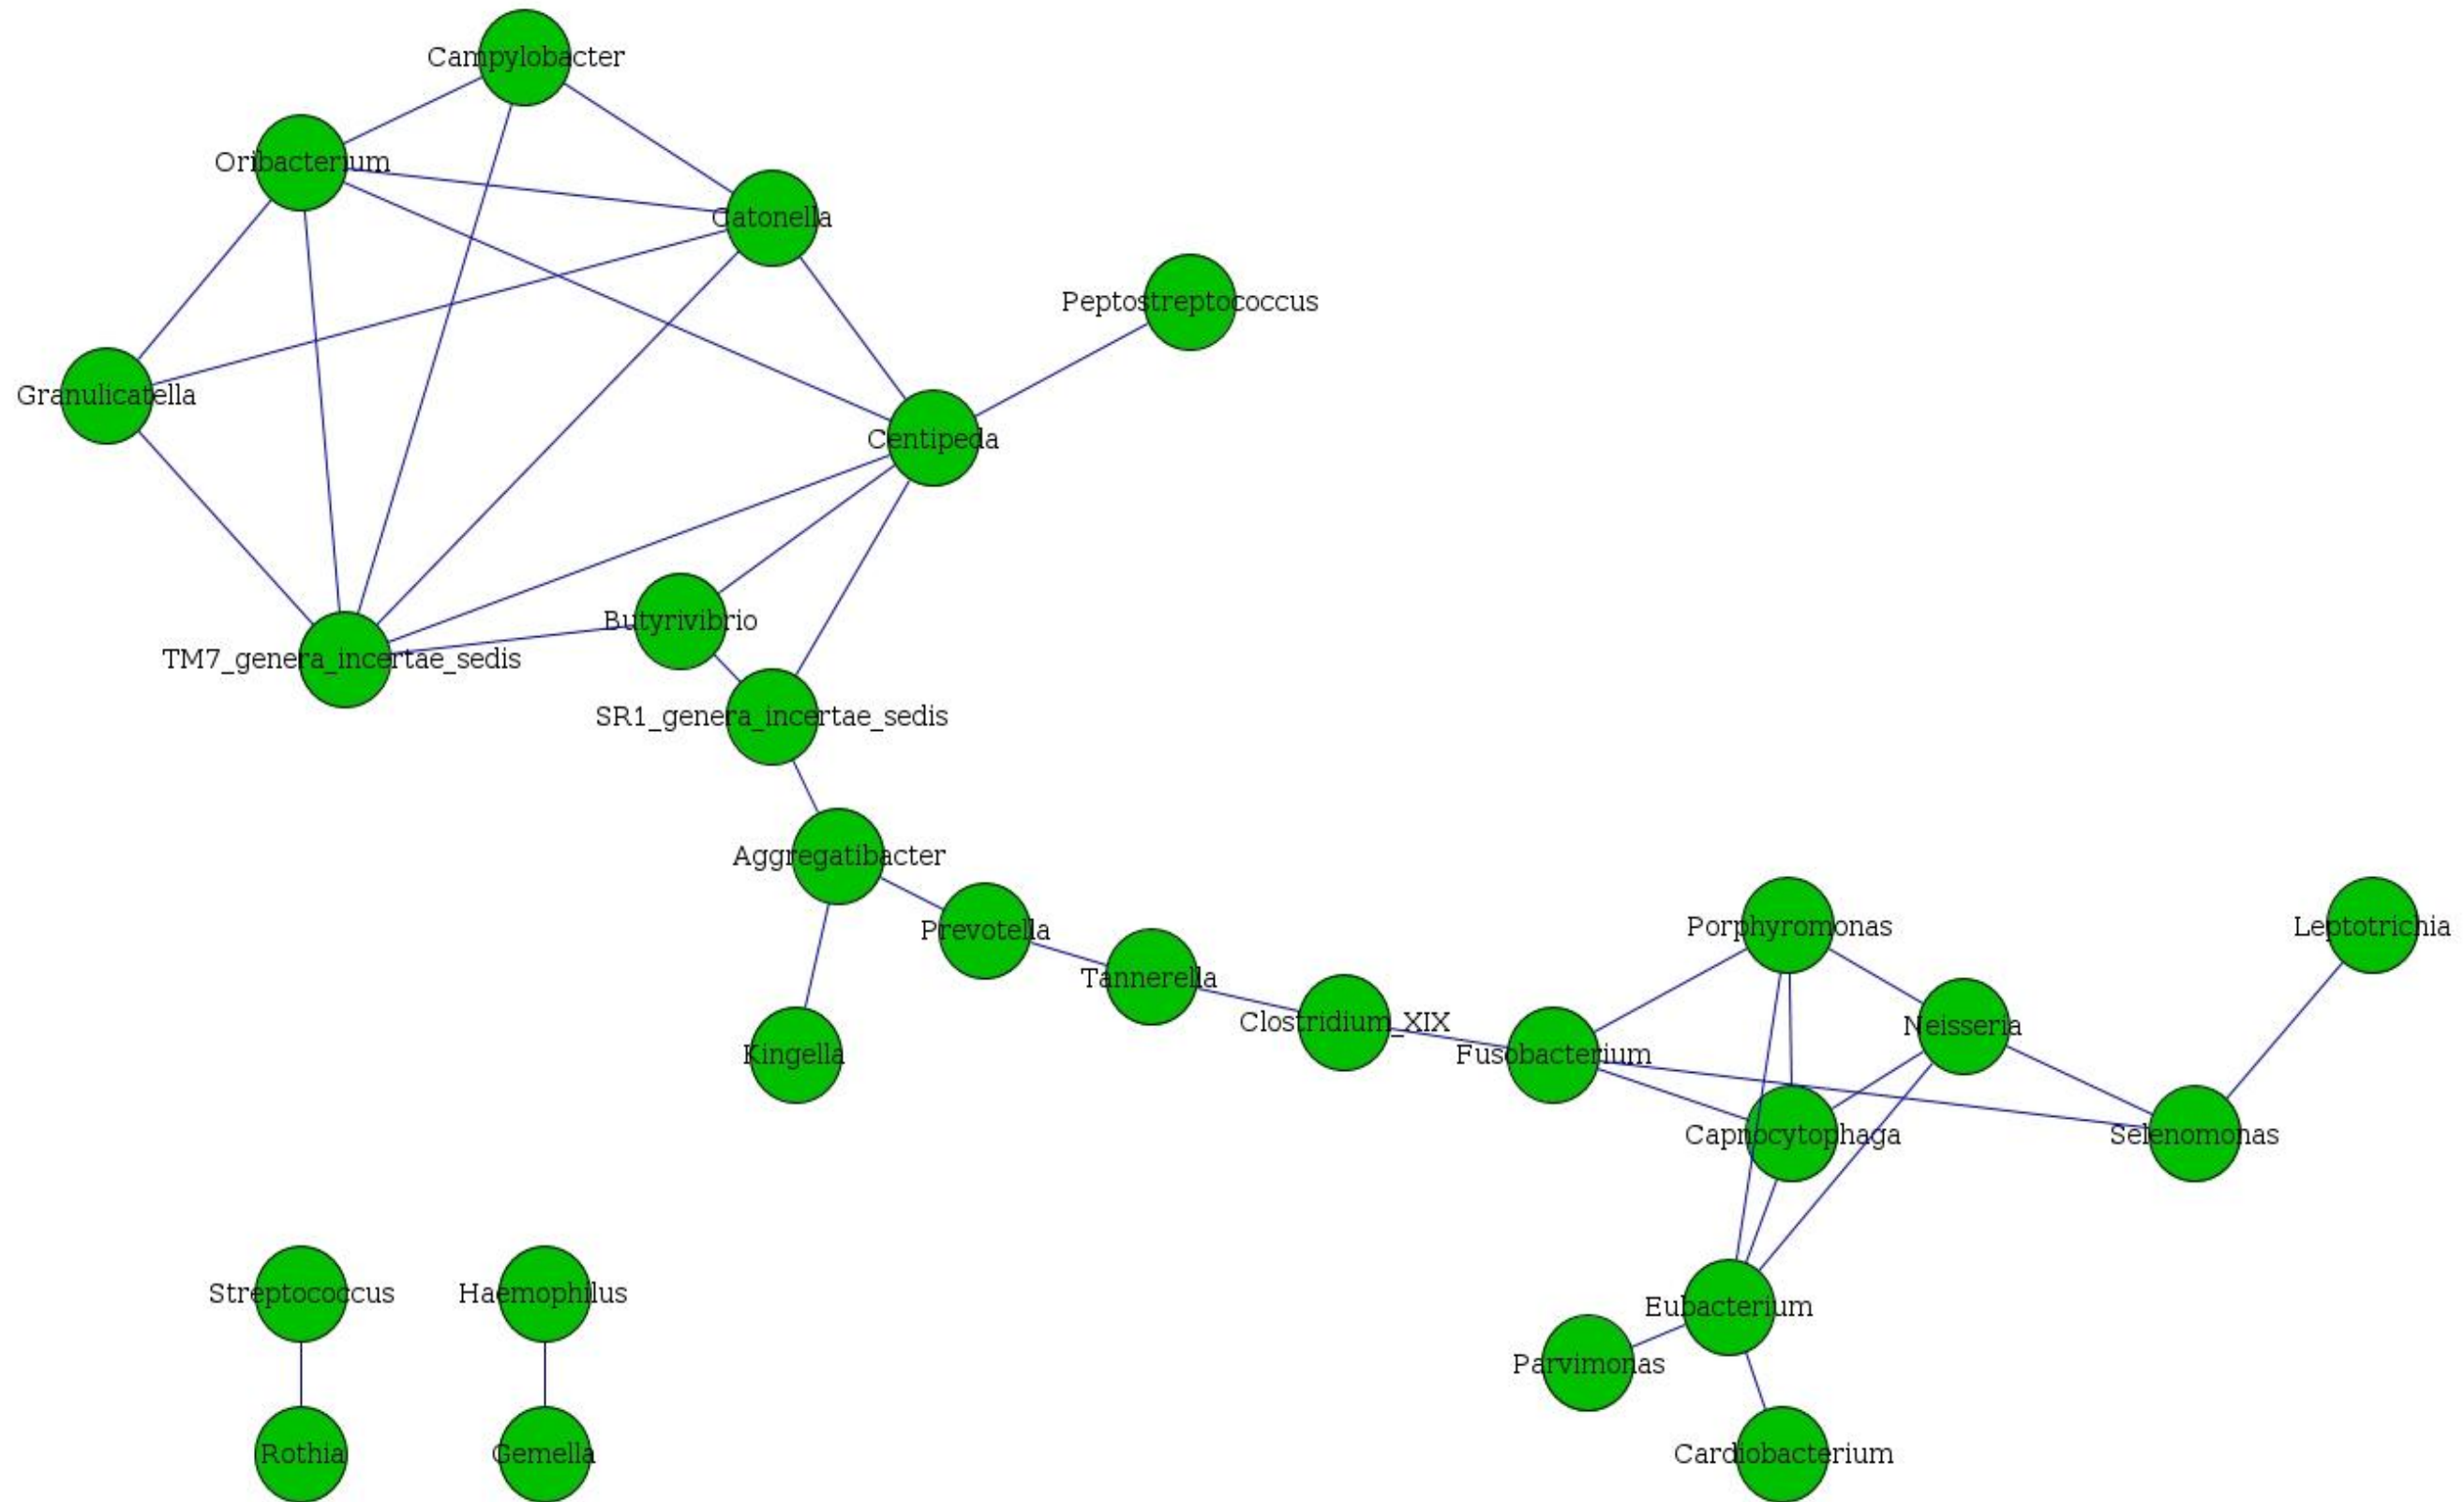

# Supplementary Figure S6: Co-occurrence network of microbial genera present in samples from Chinese study 1

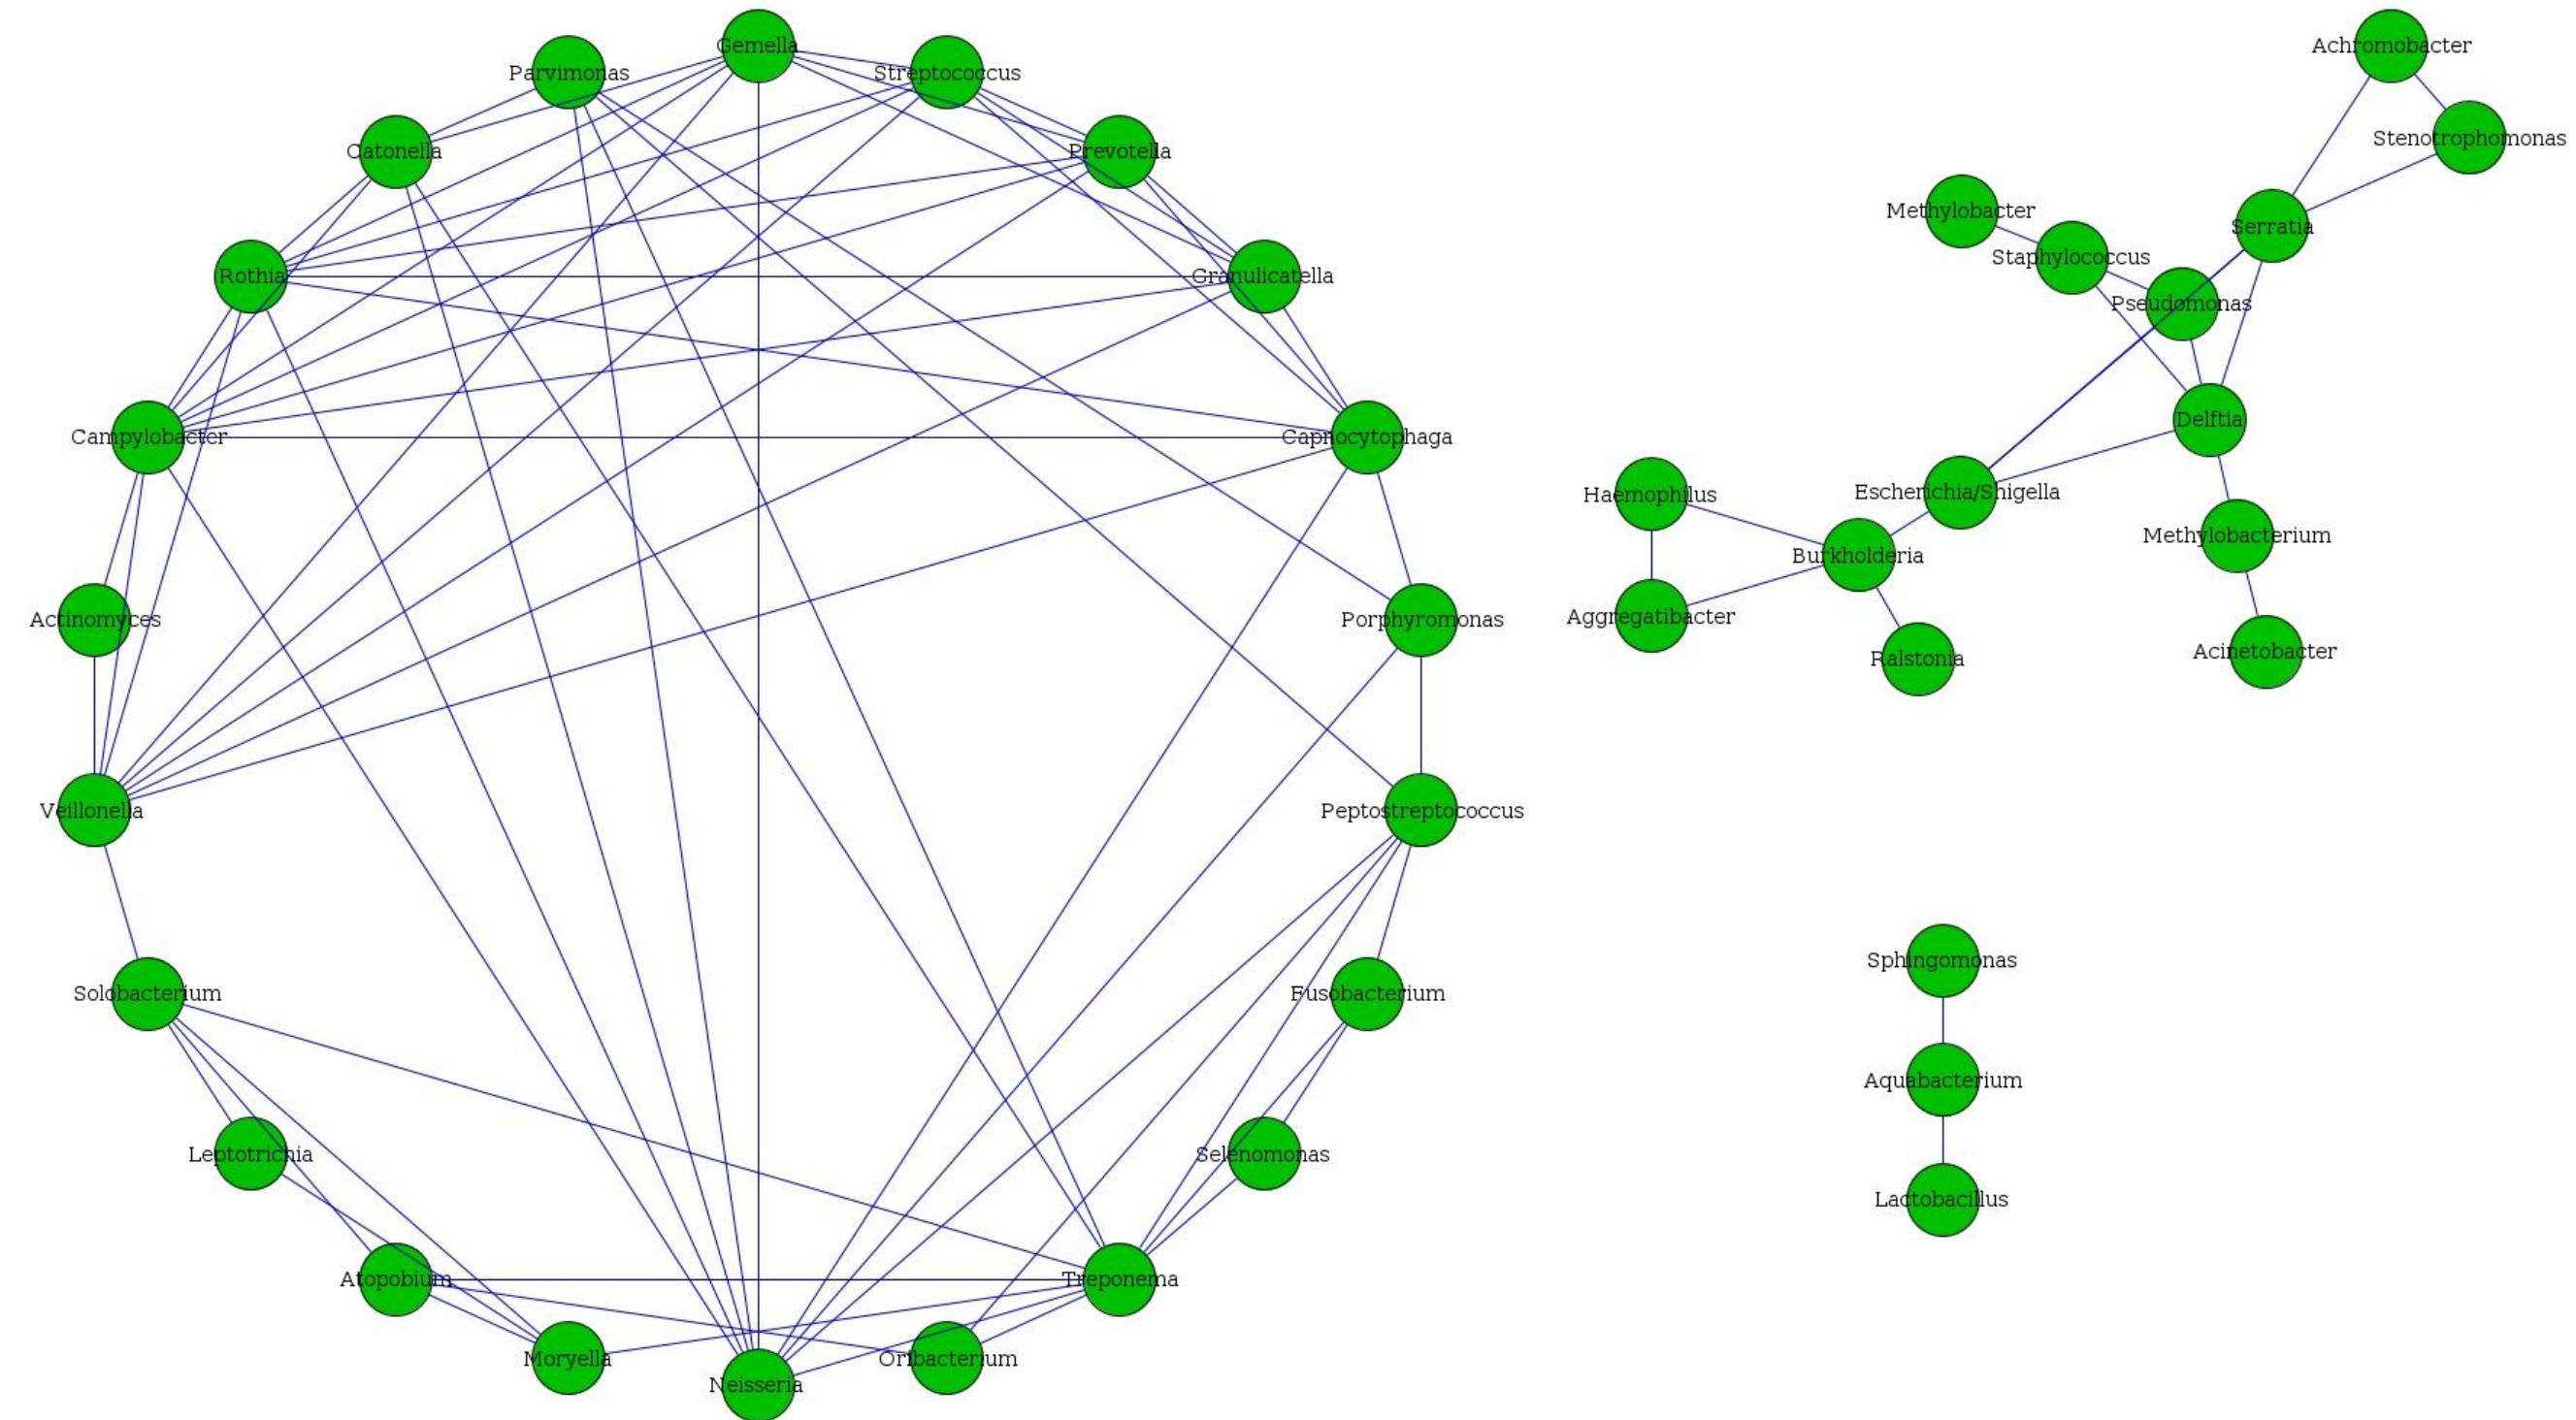

**Supplementary Figure S7:** Co-occurrence network of microbial genera present in samples from Chinese study 2

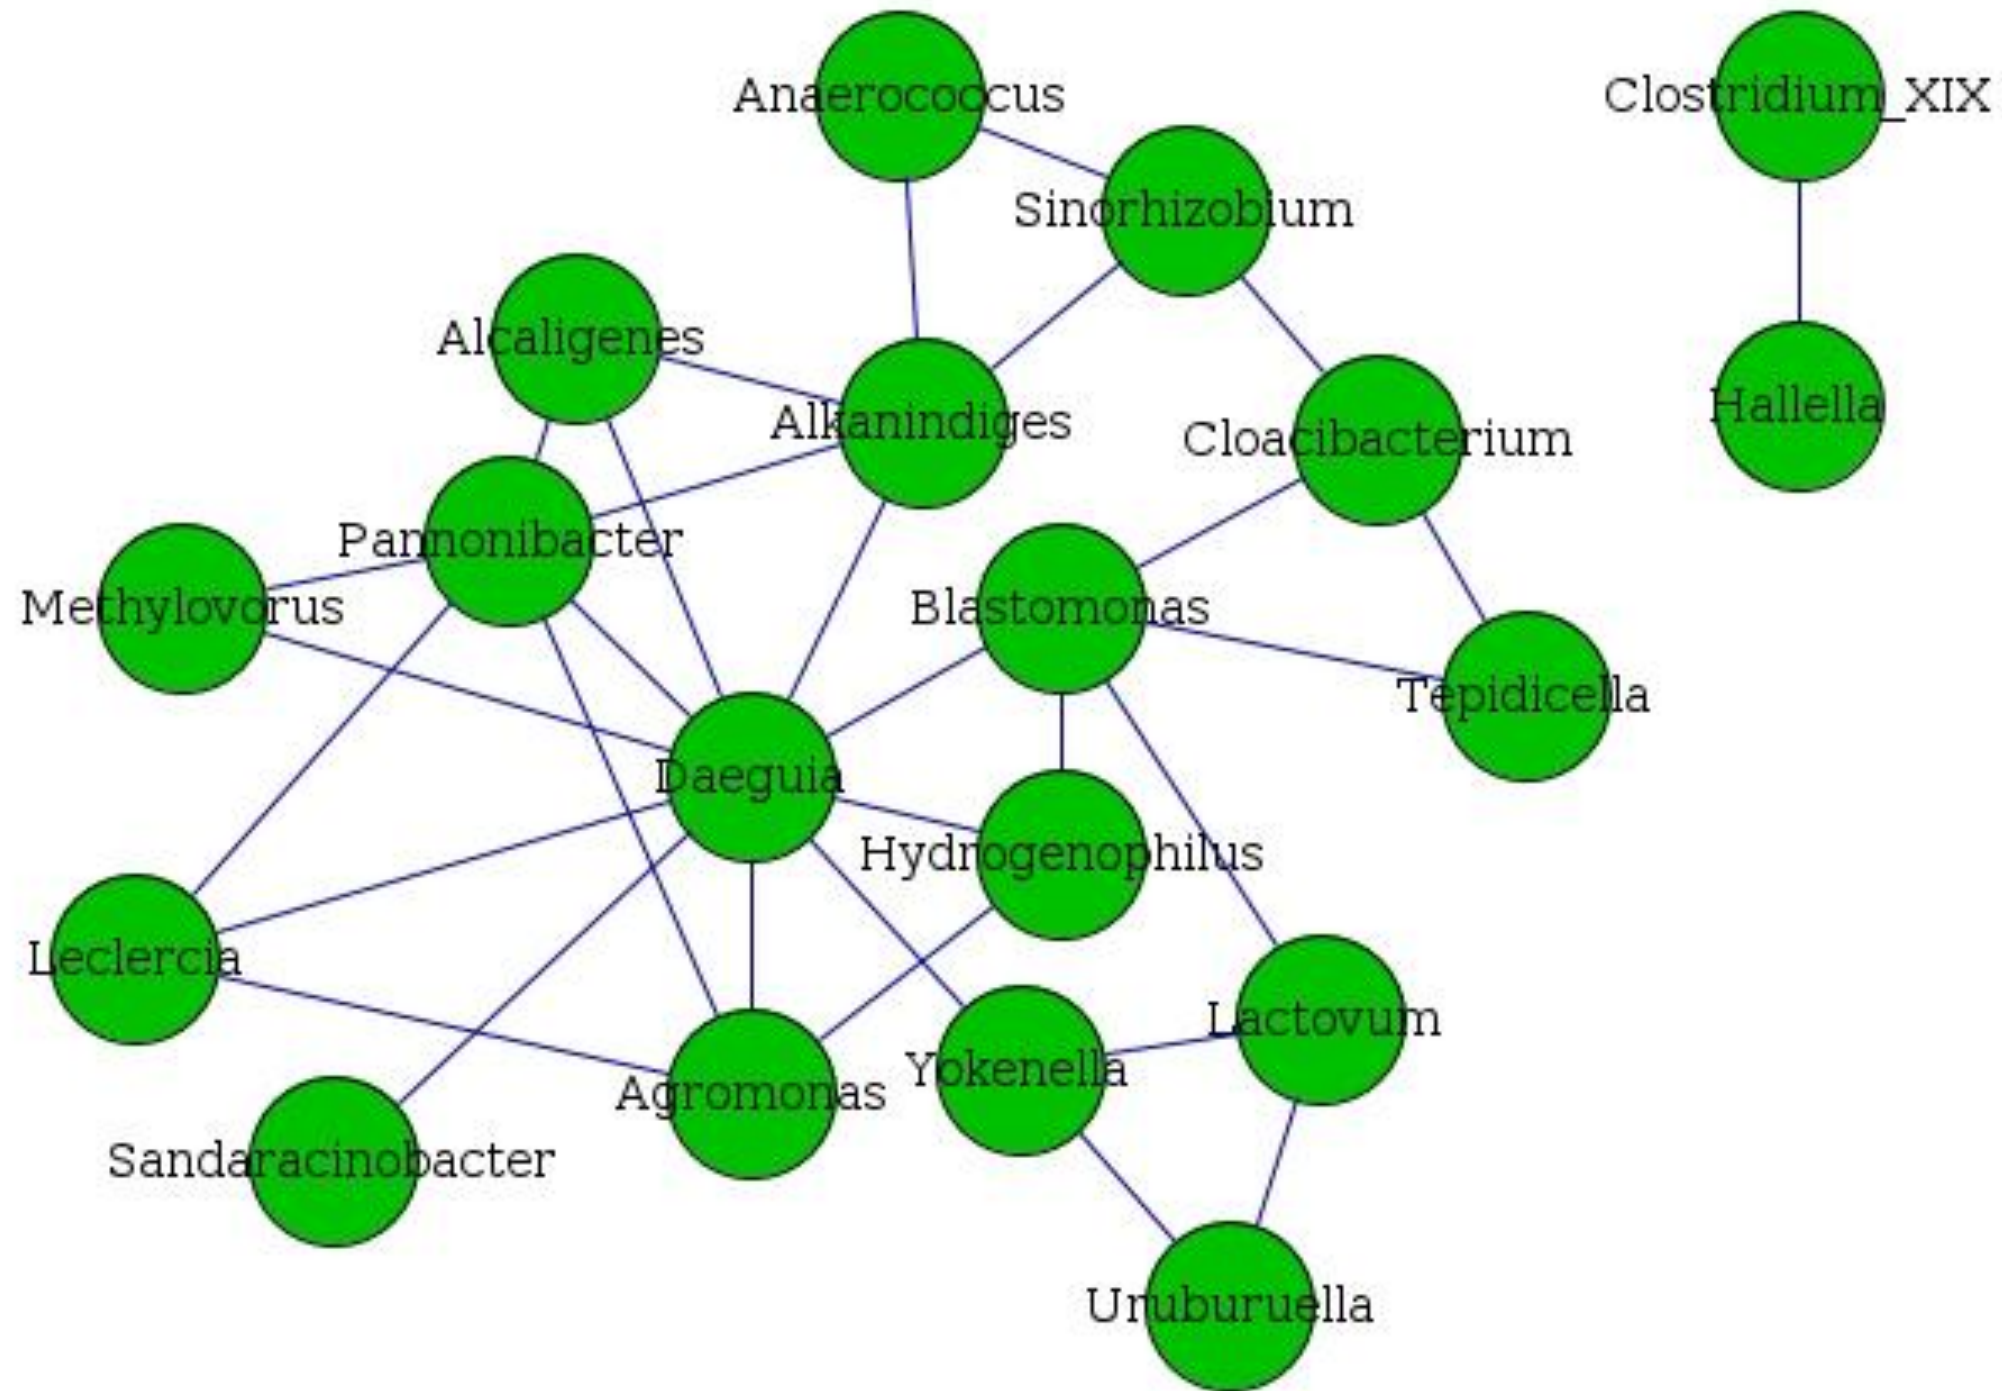

# Supplementary Figure S8: Co-occurrence network of microbial genera present in samples from Colombian study

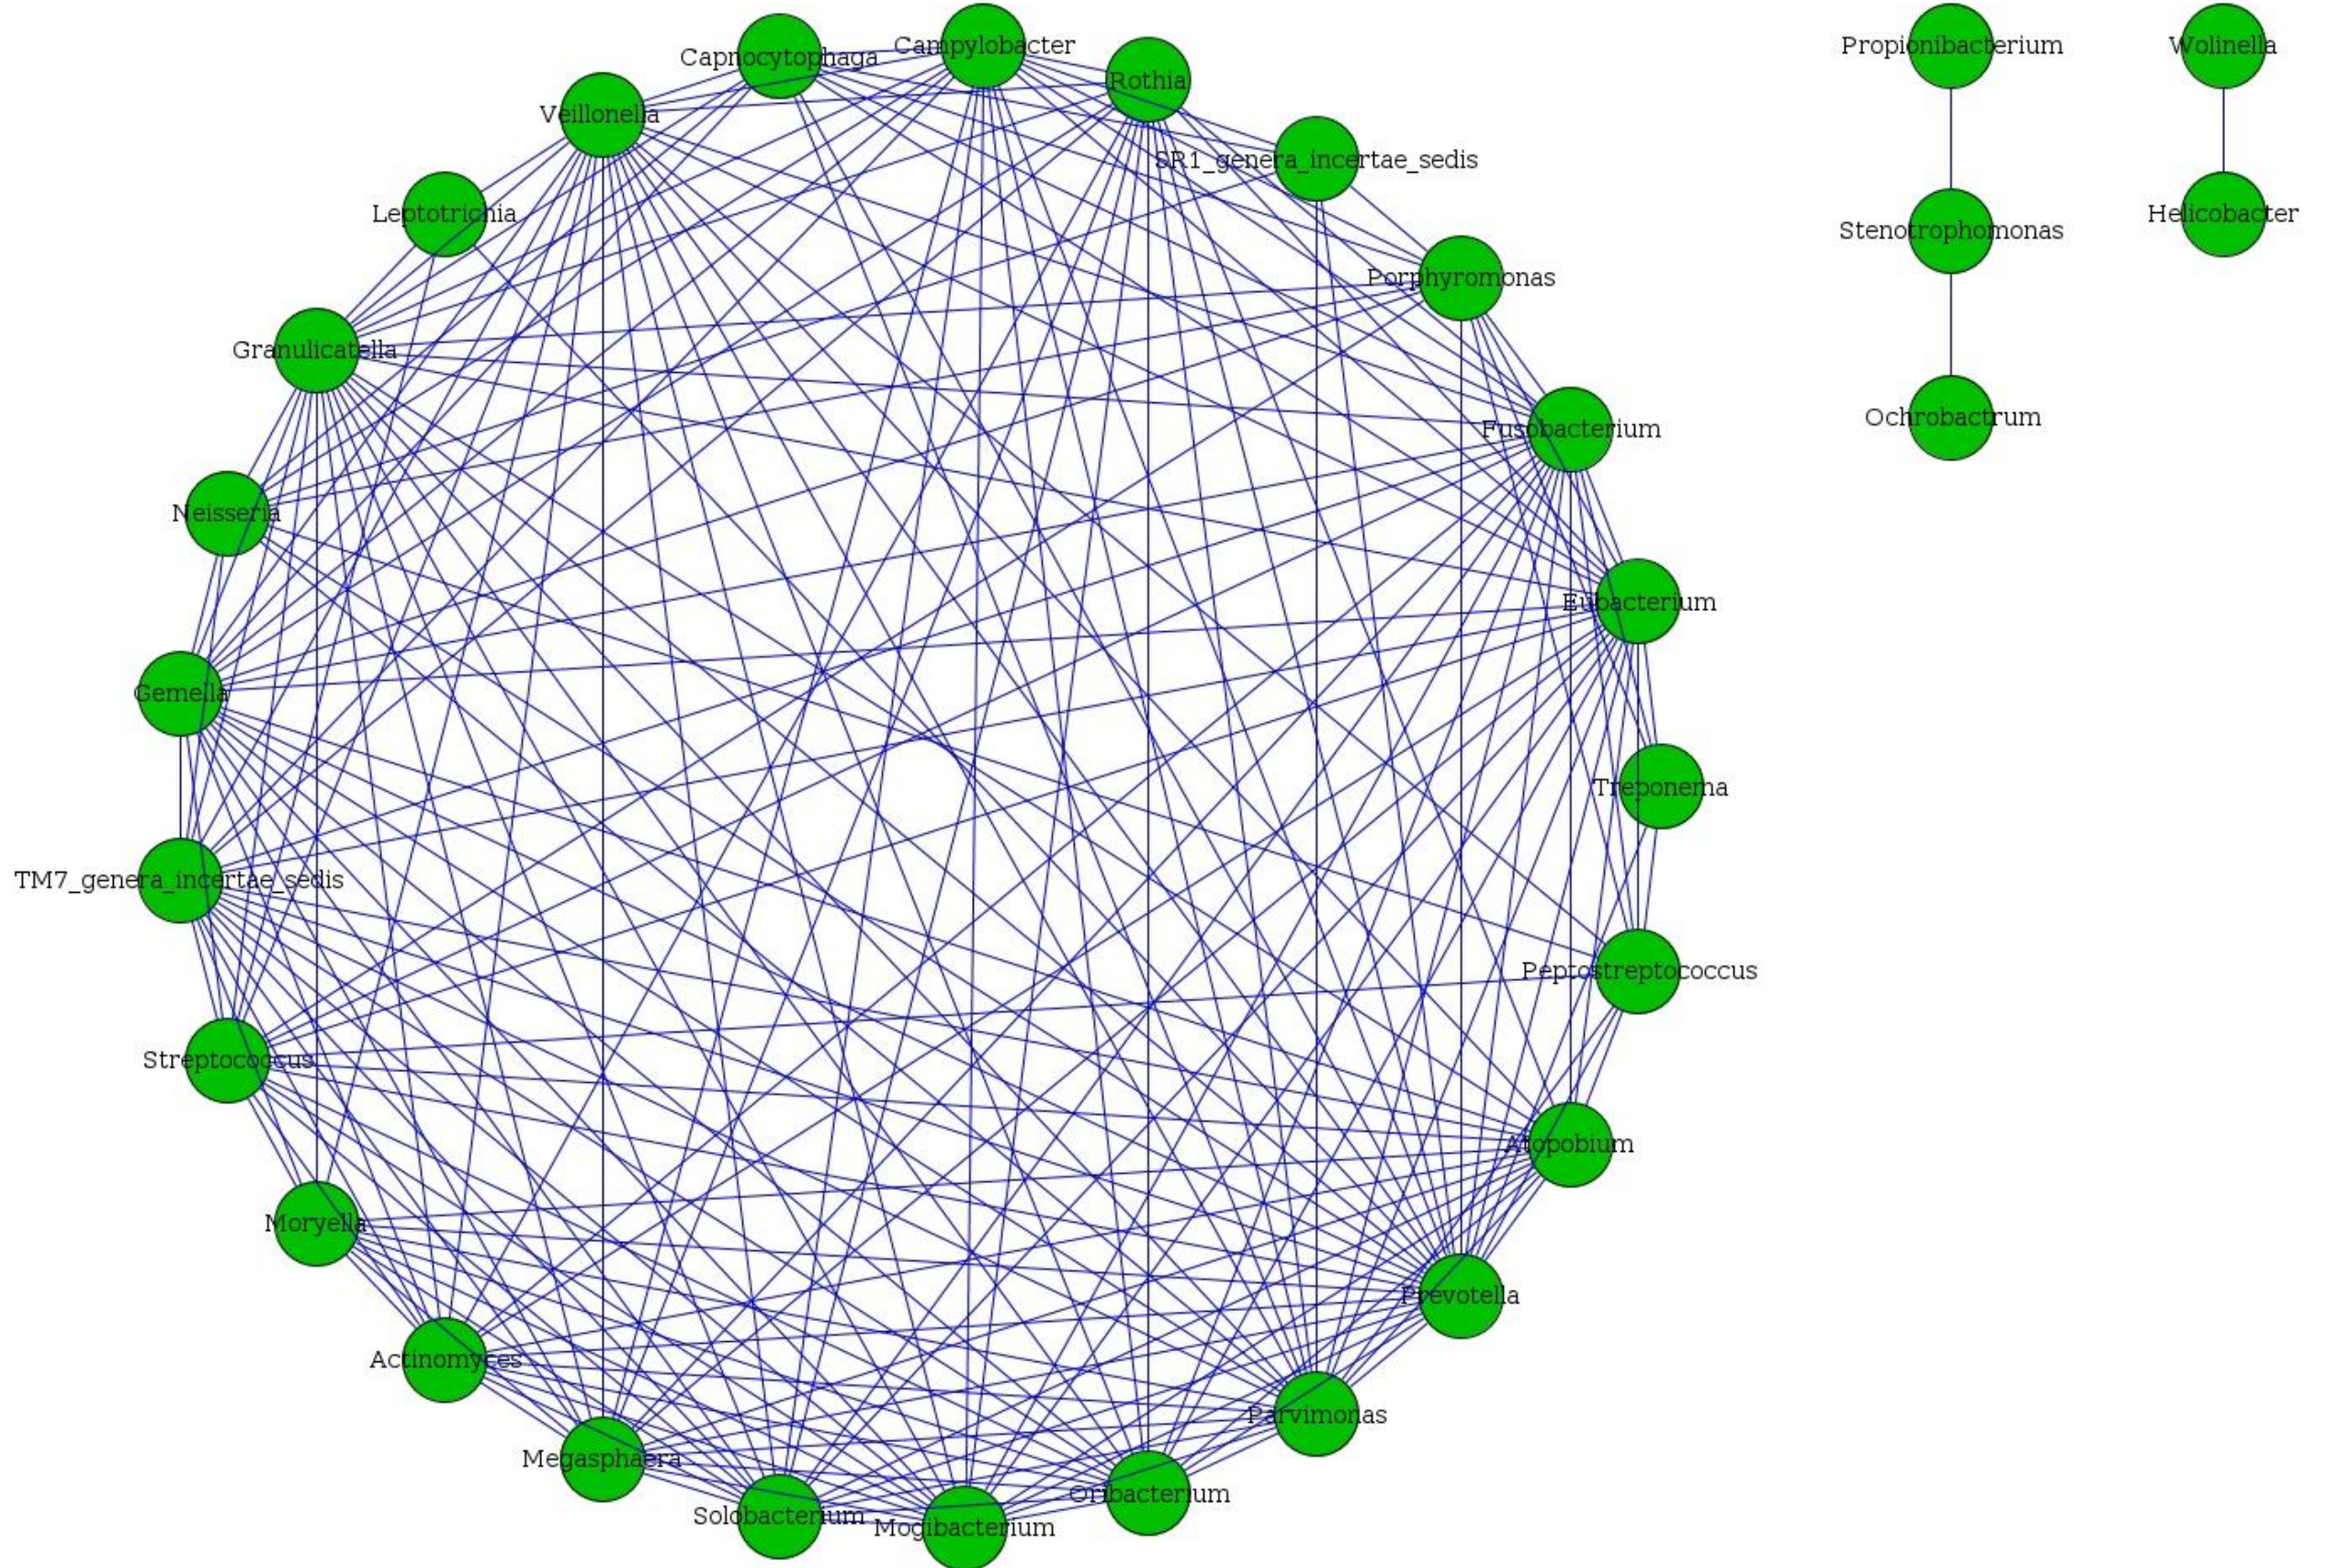

**Supplementary Figure S9:** Negative interaction network of microbial genera present in samples from USA

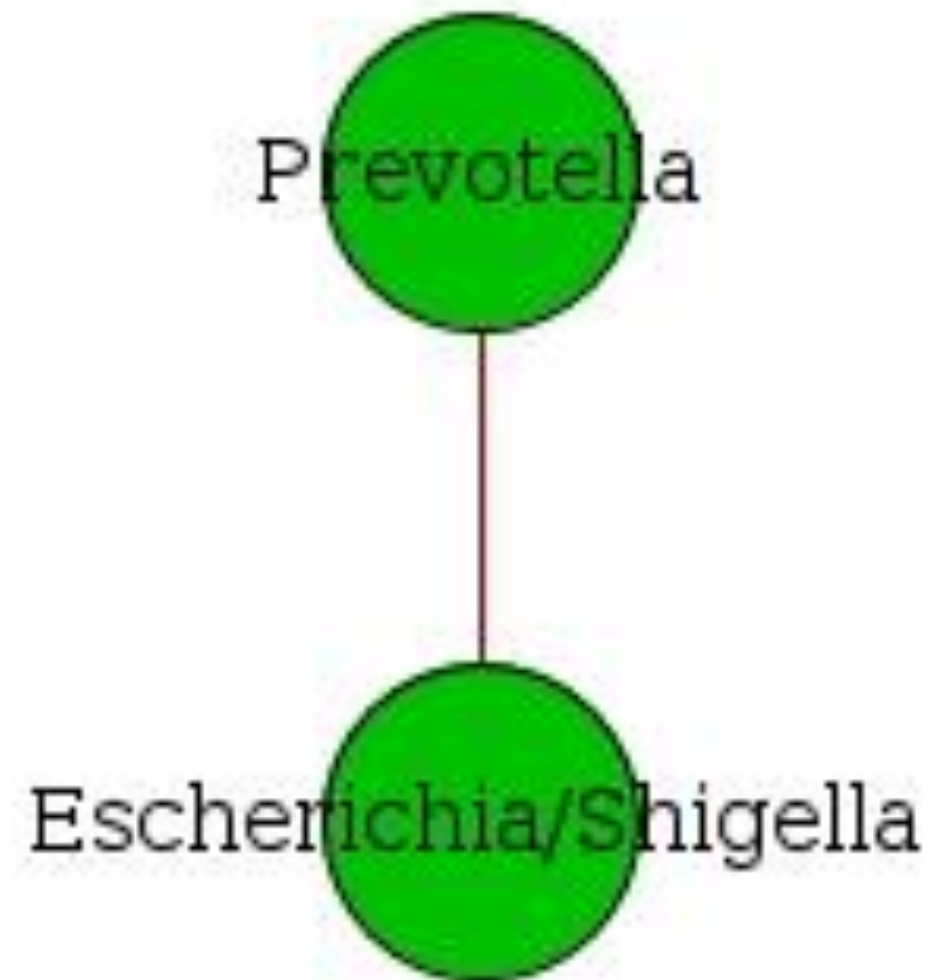



**Supplementary Figure S10:** Negative interaction network of microbial genera present in samples from Chinese study 1

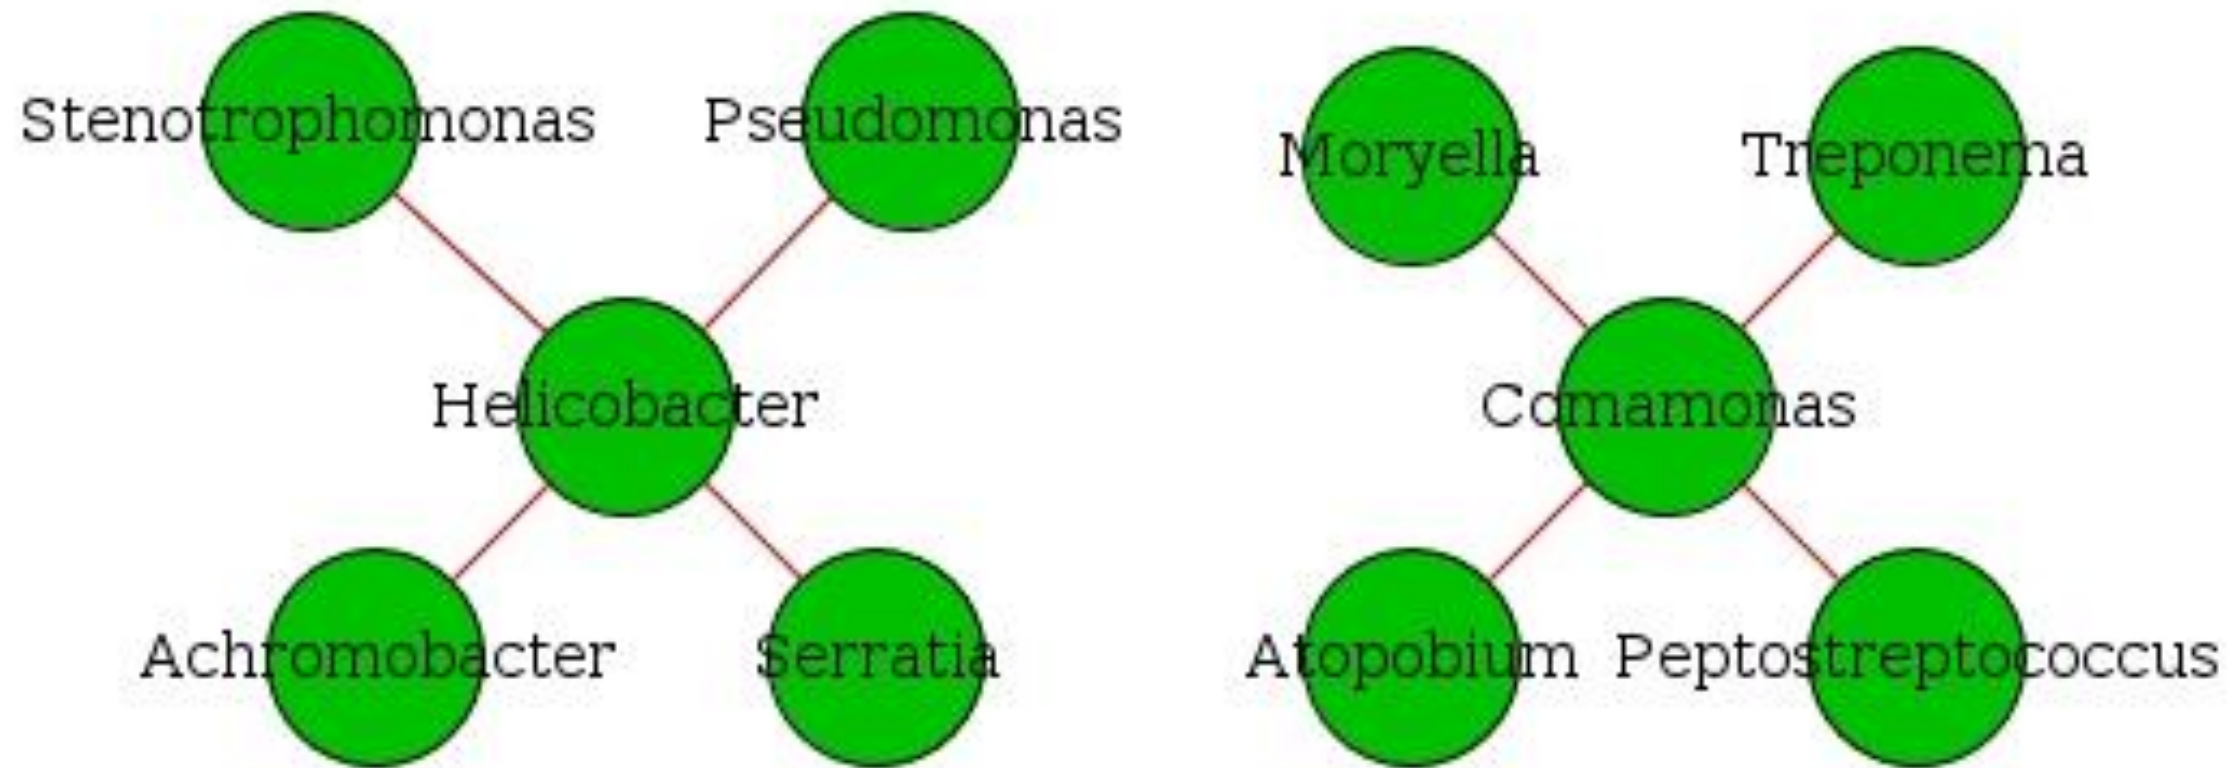

**Supplementary Figure S11:** Negative interaction network of microbial genera present in samples from Chinese study 2

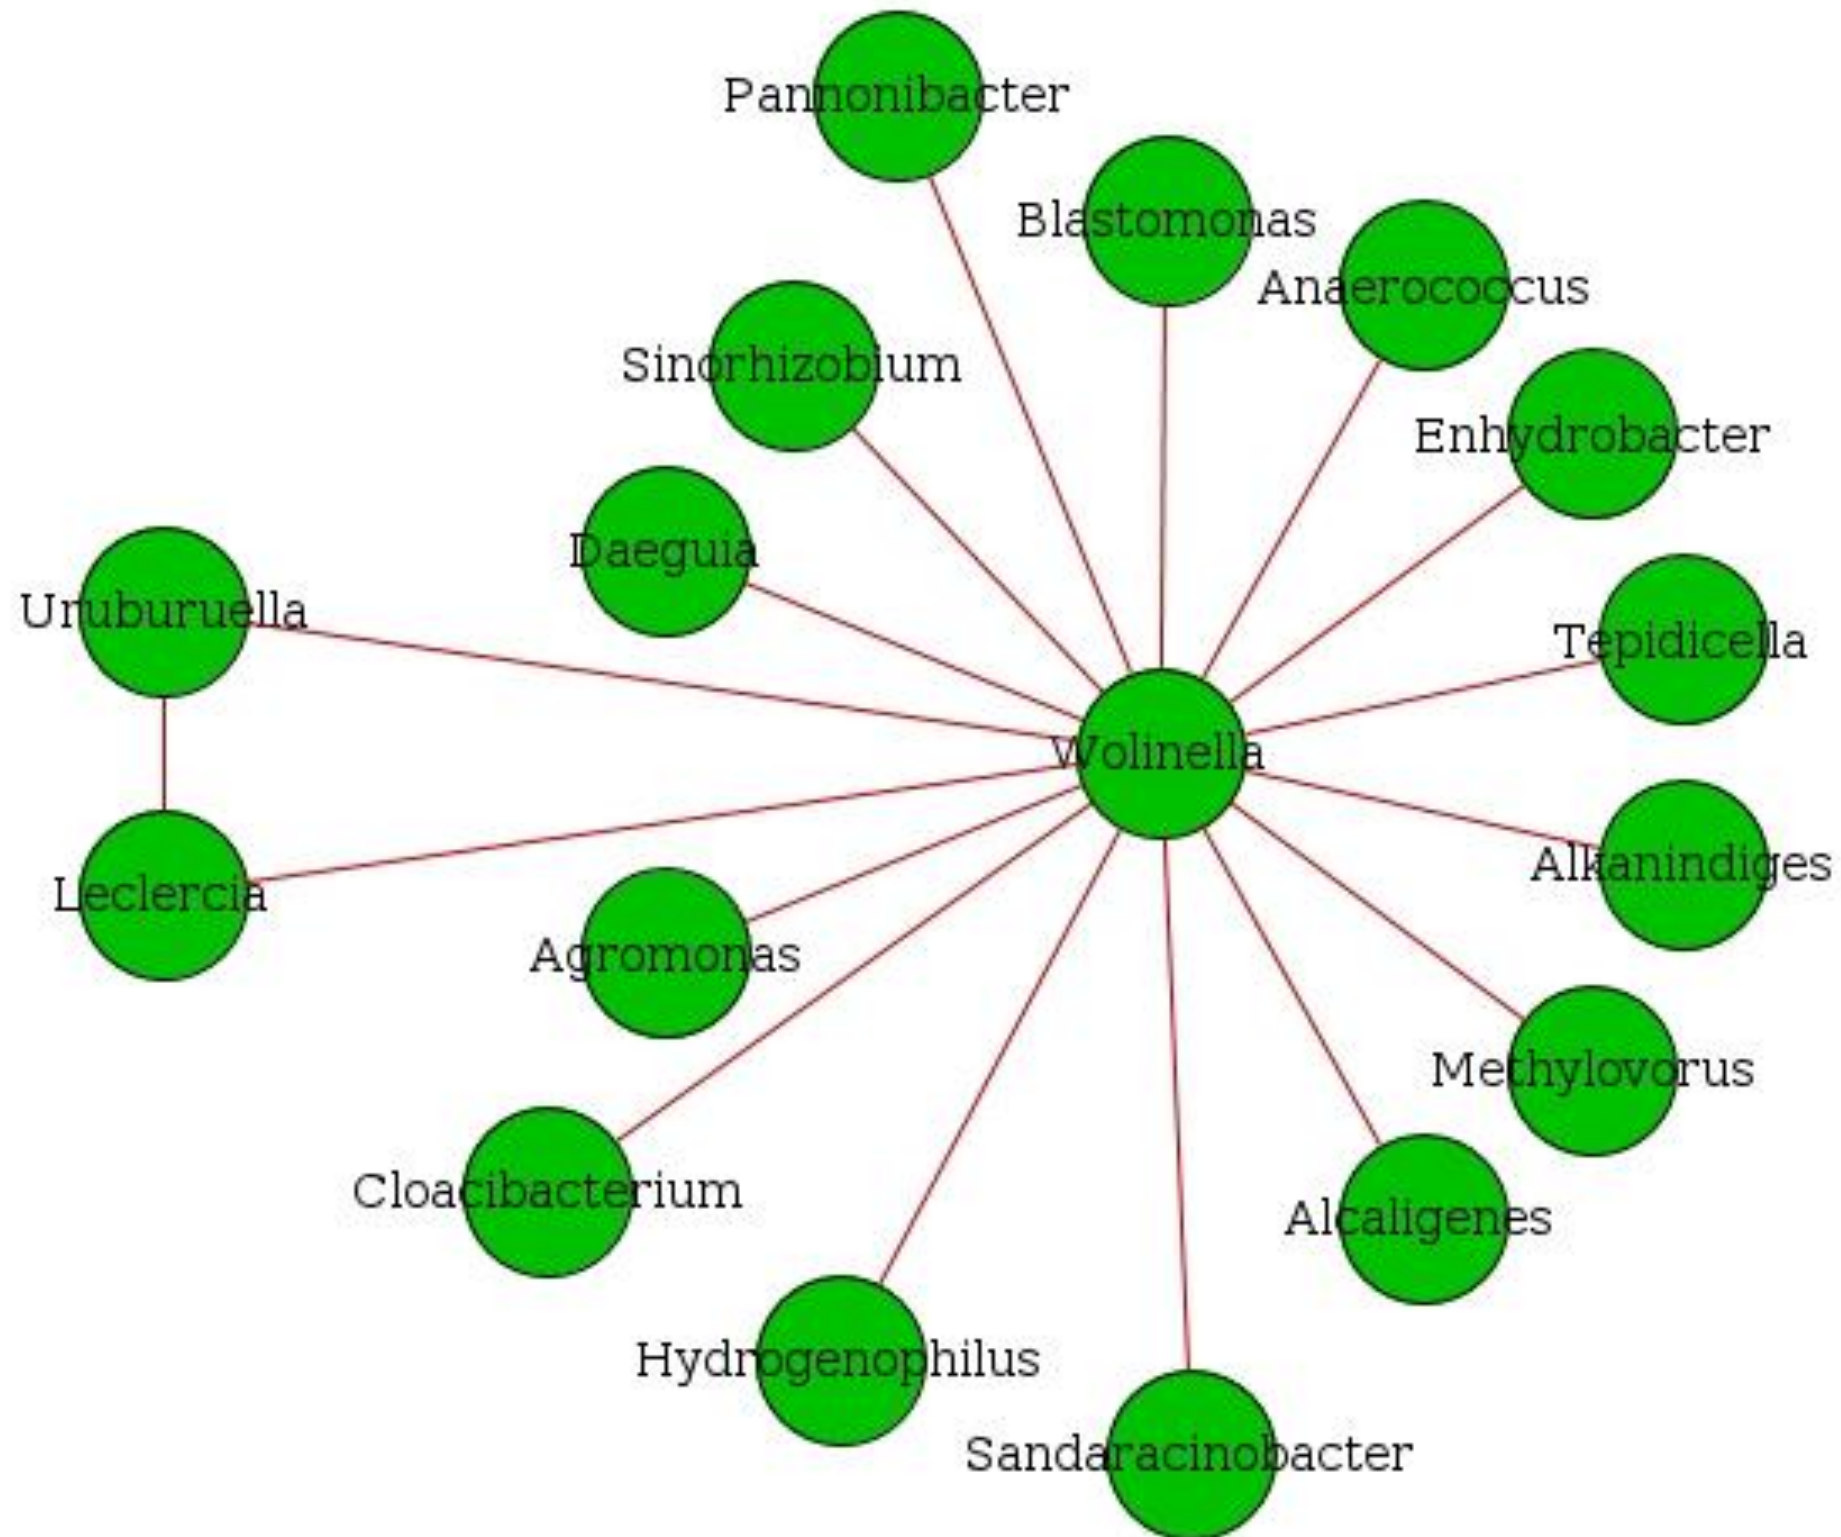

# Supplementary Figure S12: Negative interaction network of microbial genera present in samples from Colombian study

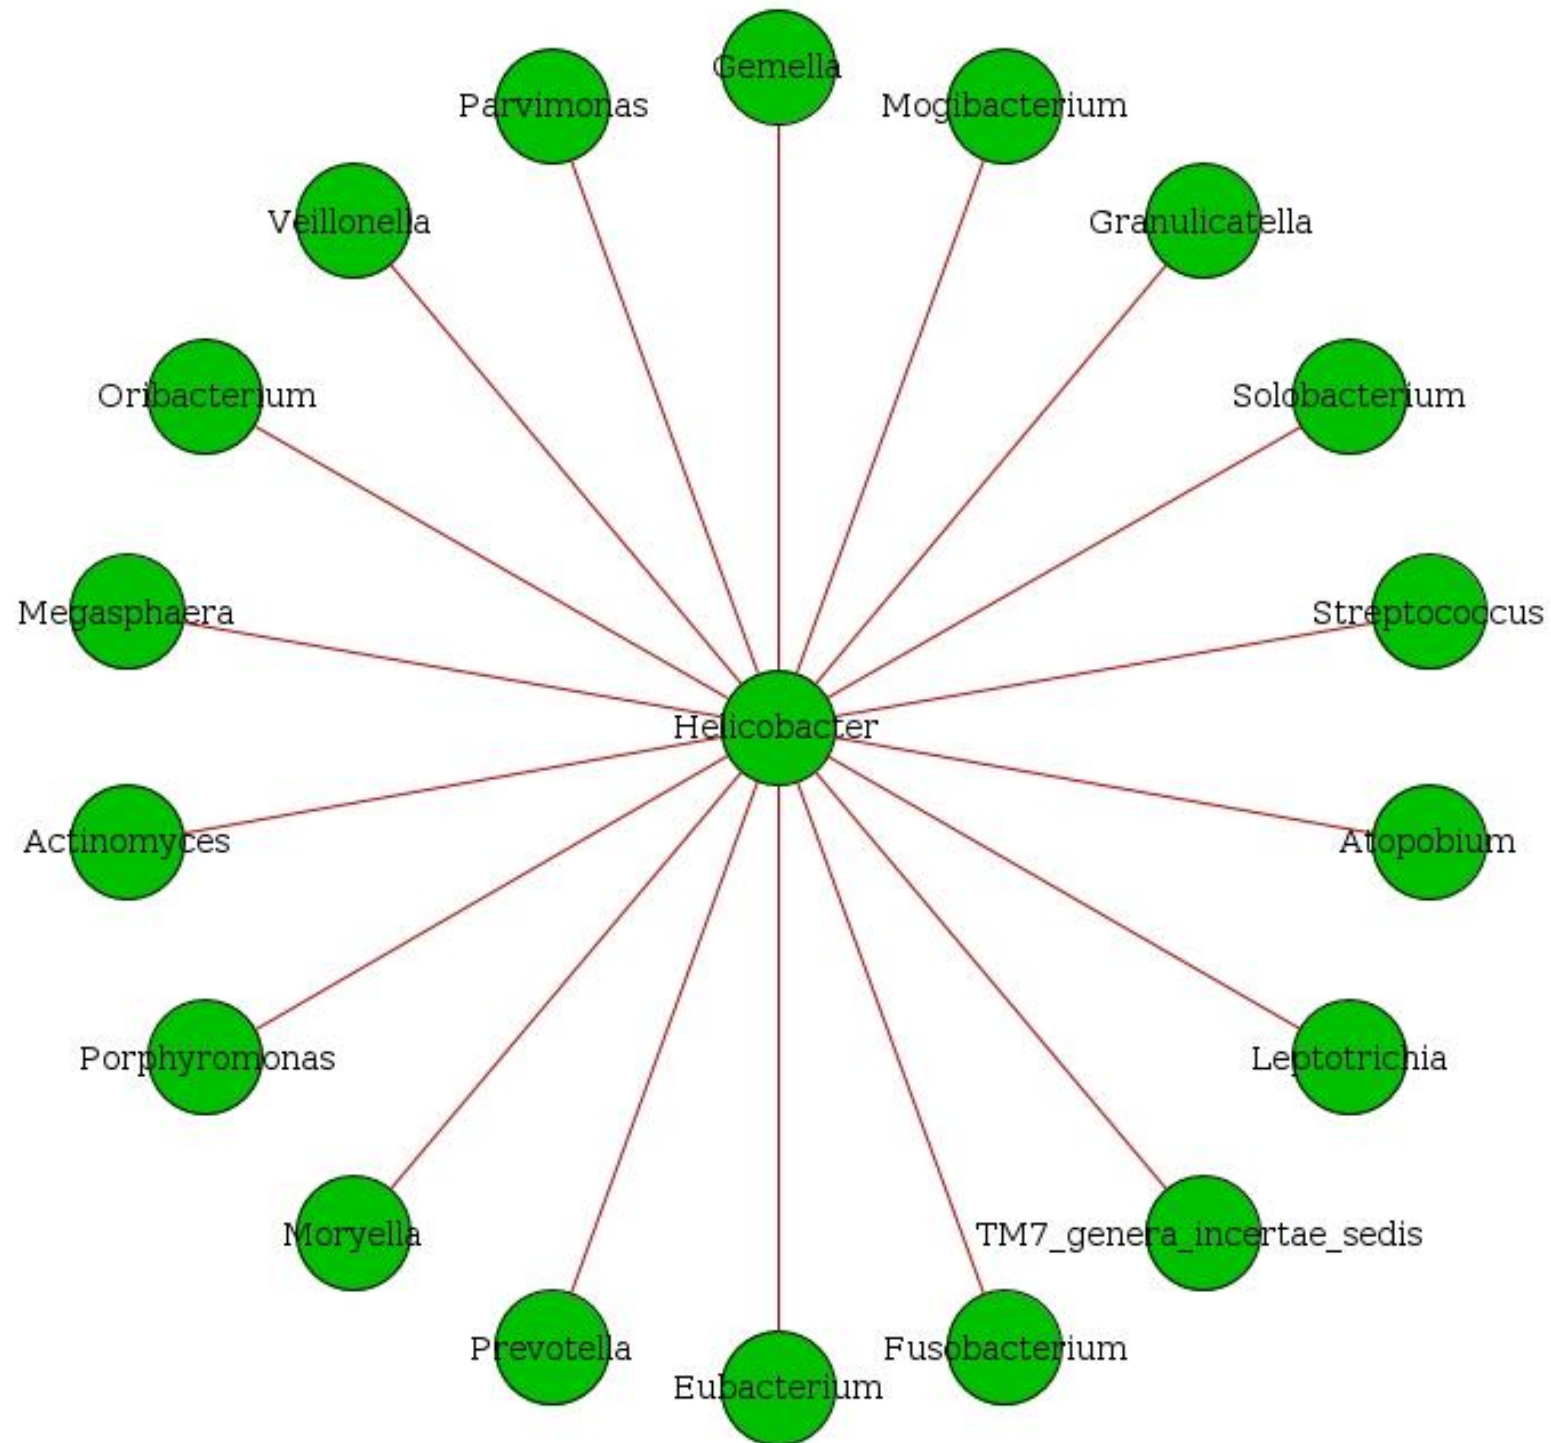

**Supplementary Figure S13:** Variation of Shannon diversity with *Wolinella* abundance, as calculated for Chinese study 2

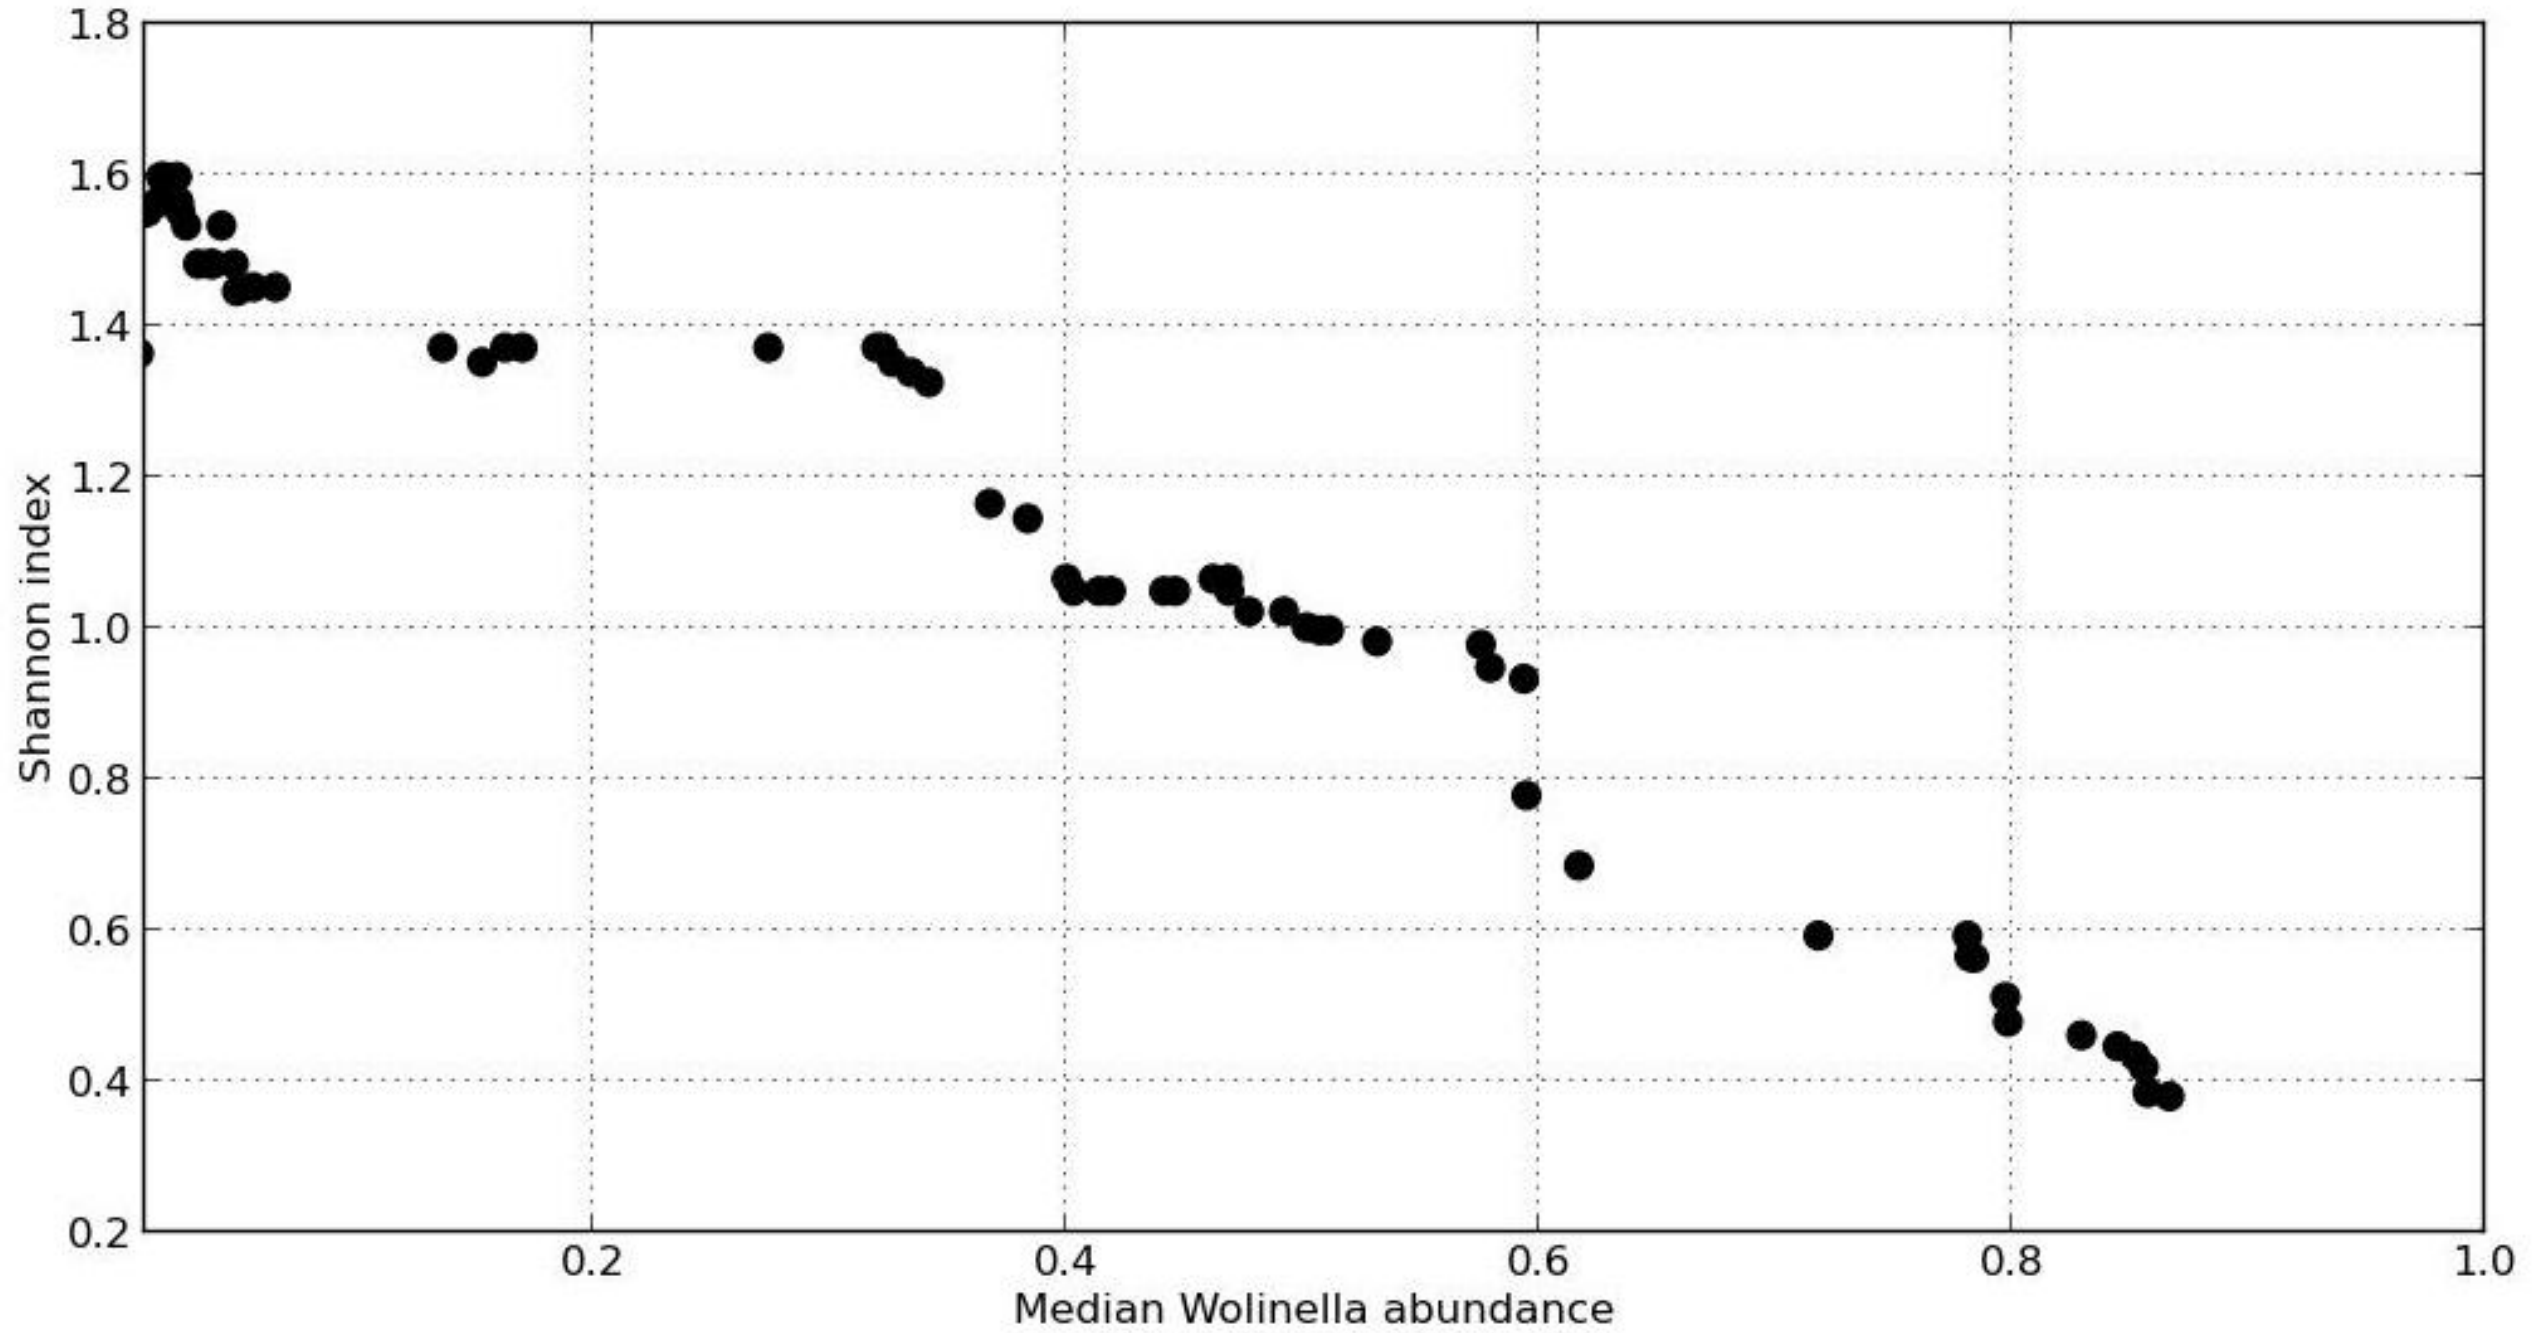

**Supplementary Figure S14:** Variation of Shannon diversity with Helicobacter abundance, as calculated for Colombian study

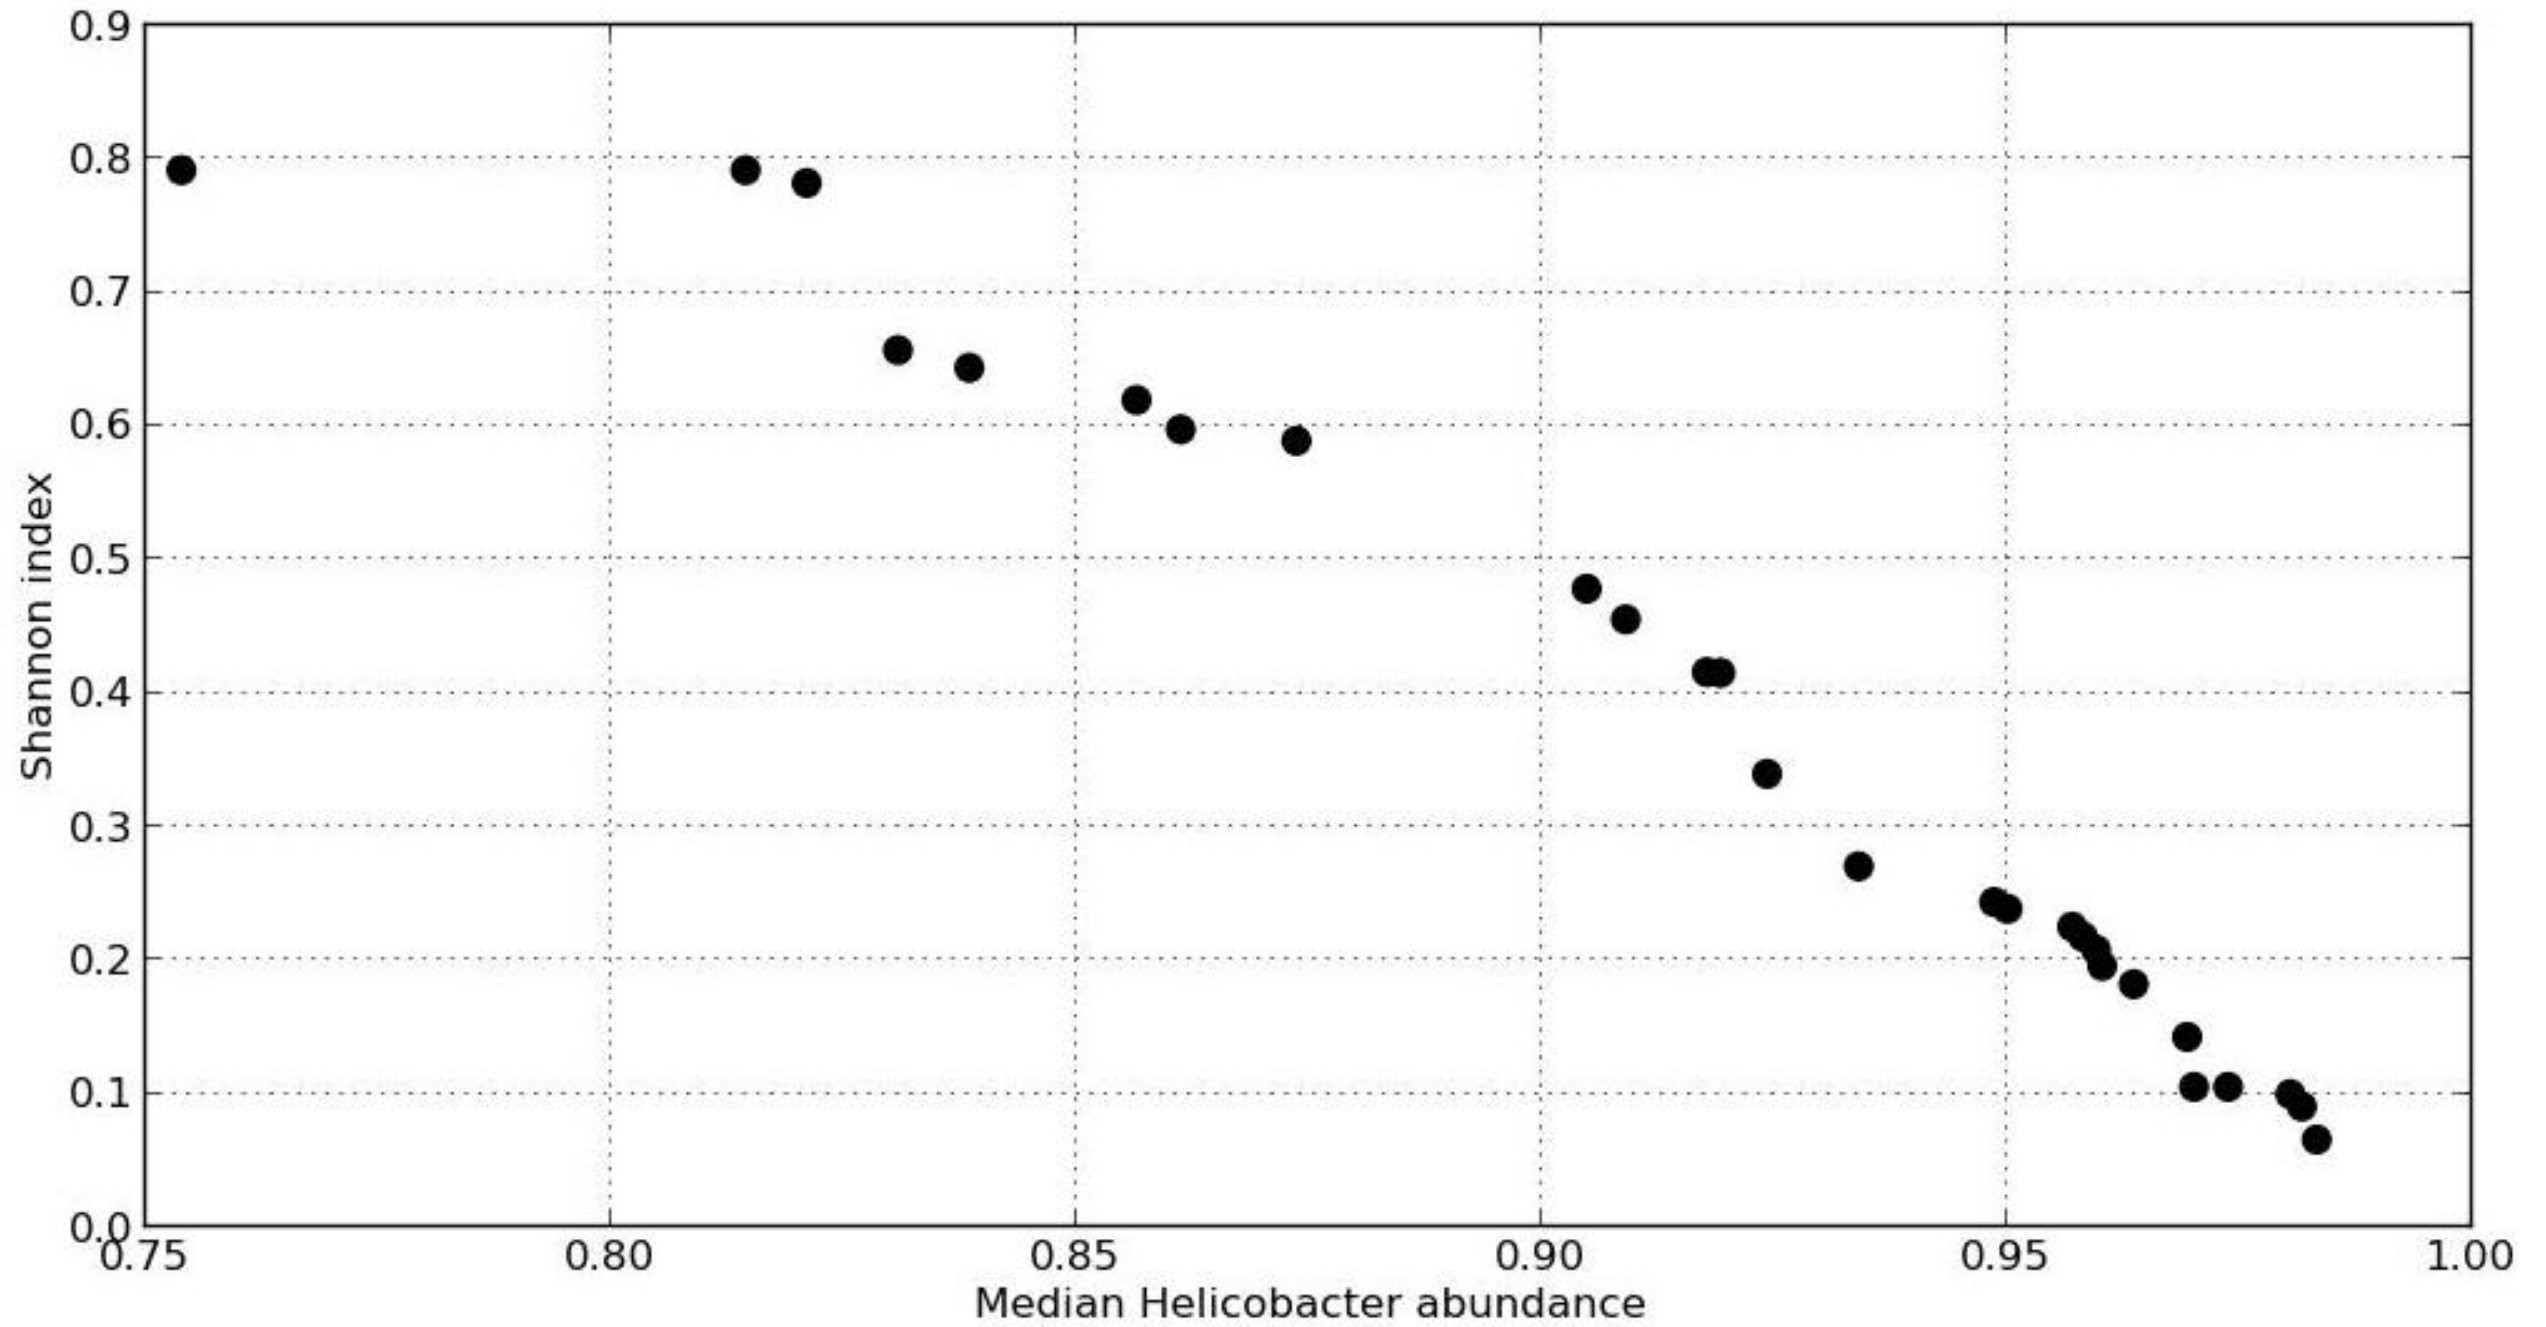

**Supplementary Table S1:** Sample IDs of subjects of reported Indian cohort, with corresponding age and gender information along with group affiliation.

| <b>SAMPLE ID</b> | <b>Age</b> | <b>Gender</b> | <b>Sample_Group</b> | <b>SAMPLE ID</b> | <b>Age</b> | <b>Gender</b> | <b>Sample_Group</b> |
|------------------|------------|---------------|---------------------|------------------|------------|---------------|---------------------|
| S1               | 24         | Male          | G3                  | S36              | 53         | Male          | G4                  |
| S2               | 54         | Male          | G2                  | S37              | 22         | Male          | G4                  |
| S3               | 40         | Male          | G3                  | S38              | 56         | Male          | G4                  |
| S5               | 43         | Female        | G3                  | S41              | 45         | Female        | G4                  |
| S6               | 85         | Female        | G2                  | S42              | 45         | Female        | G4                  |
| S7               | 27         | Male          | G2                  | S43              | 55         | Male          | G4                  |
| S8               | 56         | Male          | G2                  | S44              | 25         | Female        | G1                  |
| S9               | 24         | Male          | G2                  | S45              | 34         | Female        | G1                  |
| S10              | 34         | Male          | G3                  | S46              | 45         | Female        | G1                  |
| S11              | 79         | Male          | G2                  | S47              | 45         | Male          | G1                  |
| S12              | 30         | Female        | G3                  | S48              | 41         | Male          | G4                  |
| S15              | 85         | Male          | G3                  | S49              | 60         | Female        | G4                  |
| S17              | 31         | Female        | G3                  | S50              | 28         | Female        | G1                  |
| S27              | 21         | Male          | G1                  | S51              | 45         | Female        | G1                  |
| S29              | 48         | Male          | G1                  | S52              | 48         | Male          | G4                  |
| S30              | 52         | Male          | G1                  | S53              | 43         | Male          | G4                  |
| S31              | 29         | Male          | G1                  | S54              | 38         | Female        | G4                  |
| S32              | 78         | Male          | G1                  | S55              | 52         | Female        | G3                  |
| S33              | 60         | Female        | G1                  | S56              | 46         | Female        | G4                  |
| S34              | 62         | Male          | G3                  |                  |            |               |                     |

**Supplementary Table S2:** Taxonomic lineage from classification of Operational Taxonomic Units (OTUs).

| OTU_LIST | LINEAGE                                                                                                                                |
|----------|----------------------------------------------------------------------------------------------------------------------------------------|
| OTU1     | Bacteria;Proteobacteria;Betaproteobacteria;Burkholderiales;Comamonadaceae;Variovorax;uncultured Acidovorax sp.                         |
| OTU3     | Bacteria;Bacteroidetes;Flavobacteria;Flavobacteriales;Flavobacteriaceae;Cloacibacterium;Flavobacteriaceae bacterium RB5-M2             |
| OTU5     | Bacteria;Bacteroidetes;Bacteroidia;Bacteroidales;Prevotellaceae;Prevotella;uncultured bacterium                                        |
| OTU6     | Bacteria;Proteobacteria;Betaproteobacteria;Neisseriales;Neisseriaceae;Neisseria;uncultured bacterium                                   |
| OTU7     | Bacteria;Actinobacteria;Actinobacteria;Micrococcales;Micrococcaceae;Micrococcus;Micrococcus sp. JN12                                   |
| OTU8     | Bacteria;Proteobacteria;Gammaproteobacteria;Oceanospirillales;Halomonadaceae;Halomonas;Halomonas sp. LAR6R1                            |
| OTU12    | Bacteria;Firmicutes;Bacilli;Lactobacillales;Streptococcaceae;Streptococcus;uncultured Streptococcus sp.                                |
| OTU14    | Bacteria;Firmicutes;Negativicutes;Selenomonadales;Veillonellaceae;Veillonella;Veillonella sp. S4-C10                                   |
| OTU15    | Bacteria;Firmicutes;Clostridia;Clostridiales;Ruminococcaceae;Faecalibacterium;uncultured bacterium                                     |
| OTU16    | Bacteria;Proteobacteria;Gammaproteobacteria;Enterobacteriales;Enterobacteriaceae;Escherichia-Shigella;Escherichia coli                 |
| OTU17    | Bacteria;Proteobacteria;Gammaproteobacteria;Pasteurellales;Pasteurellaceae;Actinobacillus;uncultured bacterium                         |
| OTU20    | Bacteria;Fusobacteria;Fusobacteriia;Fusobacteriales;Fusobacteriaceae;Fusobacterium;uncultured bacterium                                |
| OTU23    | Bacteria;Firmicutes;Bacilli;Lactobacillales;Carnobacteriaceae;Carnobacterium;uncultured bacterium                                      |
| OTU27    | Bacteria;Proteobacteria;Alphaproteobacteria;Rhizobiales;Bradyrhizobiaceae;Bradyrhizobium;uncultured Bradyrhizobium sp.                 |
| OTU31    | Bacteria;Proteobacteria;Epsilonproteobacteria;Campylobacteriales;Helicobacteraceae;Helicobacter;Helicobacter pylori                    |
| OTU33    | Bacteria;Candidate division TM7;uncultured bacterium                                                                                   |
| OTU37    | Bacteria;Bacteroidetes;Bacteroidia;Bacteroidales;Bacteroidaceae;Bacteroides;bacterium NLAE-zl-G257                                     |
| OTU44    | Bacteria;Proteobacteria;Alphaproteobacteria;Rhodobacterales;Rhodobacteraceae;Paracoccus;Paracoccus sp. CS4                             |
| OTU56    | Bacteria;SM2F11;uncultured organism                                                                                                    |
| OTU60    | Bacteria;Deinococcus-Thermus;Deinococci;Thermales;Thermaceae;Meiothermus;Meiothermus silvanus DSM 9946                                 |
| OTU61    | Bacteria;Actinobacteria;Actinobacteria;Streptomyetales;Streptomyetaceae;Streptomyces;Streptomyces globosus                             |
| OTU73    | Bacteria;Bacteroidetes;Bacteroidia;Bacteroidales;Prevotellaceae;Prevotella;uncultured bacterium                                        |
| OTU76    | Bacteria;Cyanobacteria;Chloroplast;Tofieldia calyculata                                                                                |
| OTU86    | Bacteria;Proteobacteria;Alphaproteobacteria;Sphingomonadales;Sphingomonadaceae;Sphingopyxis;uncultured bacterium                       |
| OTU100   | Bacteria;Proteobacteria;Gammaproteobacteria;Chromatiales;Chromatiaceae;Nitrosococcus;uncultured bacterium                              |
| OTU111   | Bacteria;Actinobacteria;Actinobacteria;Streptomyetales;Streptomyetaceae;Streptomyces;Streptomyces globosus                             |
| OTU133   | Bacteria;Firmicutes;Clostridia;Clostridiales;Ruminococcaceae;uncultured;uncultured rumen bacterium                                     |
| OTU186   | Bacteria;Proteobacteria;Gammaproteobacteria;Pseudomonadales;Pseudomonadaceae;Pseudomonas;uncultured bacterium                          |
| OTU264   | Bacteria;Bacteroidetes;Bacteroidia;Bacteroidales;Porphyromonadaceae;Porphyromonas;uncultured bacterium                                 |
| OTU345   | Bacteria;Bacteroidetes;Bacteroidia;Bacteroidales;Prevotellaceae;Prevotella;Prevotella sp. ICM55                                        |
| OTU350   | Bacteria;Firmicutes;Clostridia;Clostridiales;Family XIII Incertae Sedis;Incertae Sedis;[Eubacterium] sulci                             |
| OTU357   | Bacteria;Bacteroidetes;Bacteroidia;Bacteroidales;Porphyromonadaceae;Porphyromonas;Porphyromonas endodontalis                           |
| OTU358   | Bacteria;Proteobacteria;Alphaproteobacteria;Rhizobiales;Methylobacteriaceae;Methylobacterium;Methylobacteriaceae bacterium KVD-1982-01 |
| OTU359   | Bacteria;Bacteroidetes;Bacteroidia;Bacteroidales;Prevotellaceae;Prevotella;uncultured bacterium                                        |
| OTU363   | Bacteria;Actinobacteria;Actinobacteria;Propionibacteriales;Propionibacteriaceae;Propionibacterium;uncultured bacterium                 |
| OTU372   | Bacteria;Proteobacteria;Gammaproteobacteria;Pseudomonadales;Moraxellaceae;Acinetobacter;Acinetobacter sp.                              |
| OTU373   | Bacteria;Proteobacteria;Gammaproteobacteria;Pseudomonadales;Moraxellaceae;Enhydrobacter;uncultured bacterium                           |
| OTU375   | Bacteria;Bacteroidetes;Bacteroidia;Bacteroidales;Prevotellaceae;Prevotella;Prevotella nanceiensis                                      |
| OTU381   | Bacteria;Bacteroidetes;Bacteroidia;Bacteroidales;Prevotellaceae;Prevotella;uncultured Bacteroidetes bacterium                          |
| OTU385   | Bacteria;Proteobacteria;Epsilonproteobacteria;Campylobacteriales;Campylobacteraceae;Campylobacter;Campylobacter concisus UNSWCD        |
| OTU386   | Bacteria;Firmicutes;Bacilli;Bacillales;Family XI Incertae Sedis;Gemella;Gemella sp. 933-88                                             |
| OTU394   | Bacteria;Proteobacteria;Alphaproteobacteria;Sphingomonadales;Sphingomonadaceae;Novosphingobium;Sphingomonas sp. SL21                   |
| OTU400   | Bacteria;Proteobacteria;Alphaproteobacteria;Caulobacteriales;Caulobacteraceae;Brevundimonas;uncultured Brevundimonas sp.               |

OTU404 Bacteria;Firmicutes;Negativicutes;Selenomonadales;Veillonellaceae;Dialister;uncultured organism  
OTU455 Bacteria;Proteobacteria;Betaproteobacteria;Burkholderiales;Burkholderiaceae;Ralstonia;unidentified marine bacterioplankton  
OTU456 Bacteria;Actinobacteria;Actinobacteria;Actinomycetales;Actinomycetaceae;Actinomyces;uncultured bacterium  
OTU463 Bacteria;Bacteroidetes;Bacteroidia;Bacteroidales;Prevotellaceae;Prevotella;uncultured bacterium  
OTU468 Bacteria;Firmicutes;Bacilli;Lactobacillales;Lactobacillaceae;Lactobacillus;uncultured bacterium  
OTU481 Bacteria;Actinobacteria;Actinobacteria;Corynebacteriales;Corynebacteriaceae;Corynebacterium;uncultured bacterium  
OTU482 Bacteria;Actinobacteria;Actinobacteria;Corynebacteriales;Nocardiaceae;Rhodococcus;Rhodococcus erythropolis  
OTU520 Bacteria;Firmicutes;Bacilli;Lactobacillales;Lactobacillaceae;Lactobacillus;uncultured bacterium  
OTU552 Bacteria;Firmicutes;Clostridia;Clostridiales;Lachnospiraceae;Stomatobaculum;Stomatobaculum longum  
OTU553 Bacteria;Proteobacteria;Gammaproteobacteria;Vibrionales;Vibrionaceae;Vibrio;Vibrio cholerae CP1048(21)  
OTU560 Bacteria;Bacteroidetes;Bacteroidia;Bacteroidales;Prevotellaceae;Prevotella;uncultured bacterium  
OTU564 Bacteria;Firmicutes;Negativicutes;Selenomonadales;Veillonellaceae;Megasphaera;Megasphaera micronuciformis F0359  
OTU565 Bacteria;Actinobacteria;Actinobacteria;Corynebacteriales;Corynebacteriaceae;Corynebacterium;uncultured bacterium  
OTU579 Bacteria;Firmicutes;Clostridia;Clostridiales;Lachnospiraceae;Oribacterium;uncultured bacterium  
OTU585 Bacteria;Firmicutes;Clostridia;Clostridiales;Lachnospiraceae;Lachnoanaerobaculum;uncultured organism  
OTU611 Bacteria;Proteobacteria;Gammaproteobacteria;Aeromonadales;Aeromonadaceae;Aeromonas;Aeromonas aquariorum  
OTU613 Bacteria;Firmicutes;Bacilli;Bacillales;Staphylococcaceae;Staphylococcus;Staphylococcus caprae  
OTU659 Bacteria;Bacteroidetes;Bacteroidia;Bacteroidales;Prevotellaceae;Prevotella;uncultured bacterium  
OTU661 Bacteria;Bacteroidetes;Bacteroidia;Bacteroidales;Prevotellaceae;Prevotella;uncultured bacterium  
OTU668 Bacteria;Firmicutes;Bacilli;Lactobacillales;Lactobacillaceae;Lactobacillus;uncultured bacterium  
OTU679 Bacteria;Proteobacteria;Gammaproteobacteria;Pseudomonadales;Pseudomonadaceae;Pseudomonas;uncultured Pseudomonas sp.  
OTU704 Bacteria;Bacteroidetes;Bacteroidia;Bacteroidales;Prevotellaceae;Prevotella;Prevotella nigrescens ATCC 33563  
OTU729 Bacteria;Firmicutes;Bacilli;Lactobacillales;Streptococcaceae;Streptococcus;Streptococcus salivarius  
OTU731 Bacteria;Proteobacteria;Gammaproteobacteria;Pseudomonadales;Pseudomonadaceae;Pseudomonas;Pseudomonas stutzeri  
OTU732 Bacteria;Proteobacteria;Gammaproteobacteria;Pasteurellales;Pasteurellaceae;Haemophilus;uncultured bacterium  
OTU757 Bacteria;Actinobacteria;Actinobacteria;Micrococcales;Micrococcaceae;Arthrobacter;Kocuria sp. SS14.15  
OTU763 Bacteria;Proteobacteria;Alphaproteobacteria;Sphingomonadales;Sphingomonadaceae;Novosphingobium;uncultured bacterium



**Supplementary Table S3: Microbial genera and corresponding lowest taxa affiliation identified at OTU level.**

| <b>Genera</b>                  | <b>Lowest Taxa Level</b>                |
|--------------------------------|-----------------------------------------|
| Acidovorax                     | Acidovorax_sp                           |
| Acinetobacter                  | Acinetobacter_sp                        |
| Actinomyces                    | Actinomyces_uncultured_bacterium        |
| Aeromonas                      | Aeromonas_aquariorum                    |
| Bacteroides                    | Bacteroides_bacterium_NLAE-zl-G257      |
| Bradyrhizobium                 | uncultured_Bradyrhizobium_sp            |
| Brevundimonas                  | uncultured_Brevundimonas_sp             |
| Campylobacter                  | Campylobacter_conciscus_UNSWCD          |
| Corynebacterium                | Corynebacterium_uncultured_bacterium1   |
| Corynebacterium                | Corynebacterium_uncultured_bacterium2   |
| Dialister                      | Dialister_uncultured_organism           |
| Enhydrobacter                  | Enhydrobacter_uncultured_bacterium      |
| Escherichia                    | Escherichia_coli                        |
| Faecalibacterium               | Faecalibacterium_bacterium              |
| Fusobacterium                  | Fusobacterium_uncultured_bacterium      |
| Gemella                        | Gemella_sp_933-88                       |
| Haemophilus                    | Haemophilus_uncultured_bacterium        |
| Halomonas                      | Halomonas_sp_LAR6R1                     |
| Helicobacter                   | Helicobacter_pylori                     |
| Lachnospiraceae_incertae_sedis | Lachnoanaerobaculum_uncultured_organism |
| Lactobacillus                  | Lactobacillus_uncultured_bacterium1     |
| Lactobacillus                  | Lactobacillus_uncultured_bacterium2     |
| Lactobacillus                  | Lactobacillus_uncultured_bacterium3     |
| Megasphaera                    | Megasphaera_micronuciformis_F0359       |
| Meiothermus                    | Meiothermus_silvanus_DSM_9946           |
| Micrococcus                    | Micrococcus_sp_JN12                     |
| Neisseria                      | Neisseria_uncultured_bacterium          |
| Novosphingobium                | Novosphingobium_uncultured_bacterium    |
| Oribacterium                   | Oribacterium_uncultured_bacterium       |
| Paracoccus                     | Paracoccus_sp_CS4                       |
| Porphyromonas                  | Porphyromonas_uncultured_bacterium      |
| Prevotella                     | Prevotella_uncultured_bacterium1        |
| Prevotella                     | Prevotella_uncultured_bacterium2        |
| Prevotella                     | Prevotella_sp_ICM55                     |
| Prevotella                     | Prevotella_uncultured_bacterium3        |
| Prevotella                     | Prevotella_nanceiensis                  |
| Prevotella                     | Prevotella_uncultured_bacterium4        |
| Prevotella                     | Prevotella_uncultured_bacterium5        |
| Prevotella                     | Prevotella_uncultured_bacterium6        |
| Prevotella                     | Prevotella_uncultured_bacterium7        |
| Prevotella                     | Prevotella_uncultured_bacterium8        |
| Prevotella                     | Prevotella_nigrescens_ATCC_33563        |

Propionibacterium  
Pseudomonas  
Pseudomonas  
Pseudomonas  
Ralstonia  
Rhodococcus  
Staphylococcus  
Streptococcus  
Streptococcus  
TM7\_genera\_incertae\_sedis  
Veillonella  
Vibrio

Propionibacterium\_uncultured\_bacterium  
Pseudomonas\_uncultured\_bacterium  
uncultured\_Pseudomonas\_sp  
Pseudomonas\_stutzeri  
Ralstonia\_unidentified\_marine\_bacterioplankton  
Rhodococcus\_erythropolis  
Staphylococcus\_caprae  
uncultured\_Streptococcus\_sp  
Streptococcus\_salivarius  
TM7\_uncultured\_bacterium  
Veillonella\_sp\_S4-C10  
Vibrio\_cholerae\_CP1048(21)

**Supplementary Table S4:** Microbial genera identified in reported Indian cohort and corresponding cluster affiliations.

| <b>Genus</b>              | <b>Cluster</b> | <b>Genus</b>                       | <b>Cluster</b> |
|---------------------------|----------------|------------------------------------|----------------|
| Actinomyces               | C1             | Acinetobacter                      | C2             |
| Bacillus                  | C1             | Aeromonas                          | C2             |
| Campylobacter             | C1             | Bacteroides                        | C2             |
| Capnocytophaga            | C1             | Blautia                            | C2             |
| Dialister                 | C1             | Bradyrhizobium                     | C2             |
| Escherichia/Shigella      | C1             | Brevundimonas                      | C2             |
| Eubacterium               | C1             | Cloacibacterium                    | C2             |
| Fusobacterium             | C1             | Corynebacterium                    | C2             |
| Gemella                   | C1             | Enhydrobacter                      | C2             |
| Granulicatella            | C1             | Erysipelotrichaceae_incertae_sedis | C2             |
| Haemophilus               | C1             | Faecalibacterium                   | C2             |
| Leptotrichia              | C1             | Halomonas                          | C2             |
| Megasphaera               | C1             | Helicobacter                       | C2             |
| Moryella                  | C1             | Klebsiella                         | C2             |
| Neisseria                 | C1             | Lachnospiraceae_incertae_sedis     | C2             |
| Novosphingobium           | C1             | Lactobacillus                      | C2             |
| Oribacterium              | C1             | Meiothermus                        | C2             |
| Porphyromonas             | C1             | Methylobacterium                   | C2             |
| Prevotella                | C1             | Micrococcus                        | C2             |
| Ralstonia                 | C1             | Paracoccus                         | C2             |
| Streptococcus             | C1             | Propionibacterium                  | C2             |
| TM7_genera_incertae_sedis | C1             | Pseudomonas                        | C2             |
| Veillonella               | C1             | Rhodococcus                        | C2             |
| Vibrio                    | C1             | Staphylococcus                     | C2             |
| Acidovorax                | C2             | Streptophyta                       | C2             |

**Supplementary Table S5:** Sample ids and sequencing information of each sample.

| <b>Samples</b>                   | <b>Number of Sequences</b> | <b>Mean_Length</b> | <b>Std. Dev. (Length)</b> | <b>PRIMER NO</b> | <b>BARCODE NAME</b> | <b>BARCODE SEQUENCE</b> |
|----------------------------------|----------------------------|--------------------|---------------------------|------------------|---------------------|-------------------------|
| S1                               | 28172                      | 865.63             | 57.42                     | 265              | 265(926R34)         | ACGGCTC                 |
| S2                               | 21460                      | 851.68             | 101.35                    | 266              | 266(926R35)         | TGCGTTC                 |
| S3                               | 21464                      | 846.48             | 69.38                     | 267              | 267(926R36)         | TCTCGAC                 |
| S5                               | 12018                      | 869.27             | 54.3                      | 269              | 269(926R38)         | ACTCCTC                 |
| S6                               | 2235                       | 832.65             | 117.07                    | 270              | 270(926R39)         | TTCCTGC                 |
| S7                               | 20859                      | 869.98             | 71.85                     | 271              | 271(926R40)         | TTCATAC                 |
| S8                               | 21600                      | 850.28             | 96.18                     | 272              | 272(926R41)         | CGTCGTC                 |
| S9                               | 5734                       | 854.26             | 84.2                      | 273              | 273(926R42)         | AAGGCAC                 |
| S10                              | 25124                      | 870.42             | 58.56                     | 274              | 274(926R43)         | AACAACTC                |
| S11                              | 7847                       | 855.38             | 102.08                    | 275              | 275(926R44)         | ACACGGAC                |
| S12                              | 11422                      | 870.59             | 59.63                     | 276              | 276(926R45)         | TGCCGAAC                |
| S15                              | 10791                      | 867.33             | 61.32                     | 279              | 279(926R48)         | CCGGCCAC                |
| S17                              | 93926                      | 866.87             | 56.88                     | 281              | 281(926R50)         | TCTCCGTC                |
| S27                              | 26981                      | 844.32             | 102.22                    | 233              | 233(926R2)          | CGCAAC                  |
| S29                              | 35996                      | 853.61             | 94.41                     | 235              | 235(926R4)          | ACTTGC                  |
| S30                              | 76213                      | 847.69             | 99.33                     | 236              | 236(926R5)          | TCACAC                  |
| S31                              | 23573                      | 851.89             | 92.07                     | 237              | 237(926R6)          | CGTGAC                  |
| S32                              | 23539                      | 848.65             | 97.76                     | 238              | 238(926R7)          | ACGCGC                  |
| S33                              | 38886                      | 852.66             | 97.6                      | 239              | 239(926R8)          | CCTCTC                  |
| S34                              | 15962                      | 842.32             | 91.37                     | 240              | 240(926R9)          | ACTCAC                  |
| S36                              | 18005                      | 843.74             | 93.09                     | 242              | 242(926R11)         | CGACTC                  |
| S37                              | 17017                      | 848.13             | 88.33                     | 243              | 243(926R12)         | AGCTTC                  |
| S38                              | 17024                      | 831.12             | 108.76                    | 244              | 244(926R13)         | AAGCCG                  |
| S41                              | 19251                      | 850.01             | 86.28                     | 247              | 247(926R16)         | TATCAAC                 |
| S42                              | 14717                      | 833.13             | 106.95                    | 248              | 248(926R17)         | AGGCGGC                 |
| S43                              | 15626                      | 846.68             | 97.37                     | 249              | 249(926R18)         | CGGTATC                 |
| S44                              | 16486                      | 822.07             | 115.49                    | 250              | 250(926R19)         | TGACGAC                 |
| S45                              | 19710                      | 844.75             | 94.84                     | 251              | 251(926R20)         | ACAAGGC                 |
| S46                              | 14008                      | 835.19             | 103.69                    | 252              | 252(926R21)         | AGACCTC                 |
| S47                              | 14555                      | 835.08             | 110.58                    | 253              | 253(926R22)         | ATACCAC                 |
| S48                              | 26128                      | 840.44             | 96.42                     | 254              | 254(926R23)         | TCGCGGC                 |
| S49                              | 23249                      | 860.51             | 69.57                     | 255              | 255(926R24)         | ATCTTAC                 |
| S50                              | 14498                      | 847.4              | 97.1                      | 256              | 256(926R25)         | AACCAGC                 |
| S51                              | 12397                      | 845.22             | 95.99                     | 257              | 257(926R26)         | TTCGAGC                 |
| S52                              | 13412                      | 848.69             | 87.77                     | 258              | 258(926R27)         | AAGGTGC                 |
| S53                              | 18172                      | 836.62             | 100.89                    | 259              | 259(926R28)         | TCTTGGC                 |
| S54                              | 15888                      | 826.09             | 99.15                     | 260              | 260(926R29)         | TAATCTC                 |
| S55                              | 20218                      | 850.24             | 83.09                     | 261              | 261(926R30)         | TCACCTC                 |
| S56                              | 60072                      | 849.32             | 86.14                     | 262              | 262(926R31)         | TCCGCTC                 |
| <b>Total Sequences</b>           | 941415                     |                    |                           |                  |                     |                         |
| <b>Filtered Sequences</b>        | 940591                     |                    |                           |                  |                     |                         |
| <b>Sequences fetched by tags</b> | 894235                     |                    |                           |                  |                     |                         |
